# Supplementary material for: Isostructurality and energetics of competitive C–H⋯π interactions in adamantane-benzoate hybrids: a computational ADME study
Source: Royal Society of Chemistry journal article supplement (doi:10.1039/d6ra01672c), 2026-06-02
Supplement: d6ra01672c1.pdf [file d6ra01672c1.pdf]

# RSC Advances

## Supplementary Information

### Isostructurality and Energetics of Competitive C–H··· $\pi$ Interactions in Adamantane-Benzoate Hybrids: A Computational ADME Study†

*Hiram Pérez*<sup>a,\*</sup>

<sup>a</sup>Universidad de La Habana, Facultad de Química.  
Zapata s/n, e/ G y Carlitos Aguirre, Vedado, Habana 10400, Cuba.

\*Correspondence Author: E-mail: [hiramperezperez49@gmail.com](mailto:hiramperezperez49@gmail.com)

# List of Figures

|     | pag.                                                                                                                                                                                      |
|-----|-------------------------------------------------------------------------------------------------------------------------------------------------------------------------------------------|
| S1  | XPac results for BUVCIG–BUVDIH pair. S2                                                                                                                                                   |
| S2  | XPac results for BUVDAZ–BUTQEO pair. S2                                                                                                                                                   |
| S3  | XPac results for BUVDUT–BUTPUD pair. S3                                                                                                                                                   |
| S4  | XPac results for BUVCUS–BUVDON pair. S3                                                                                                                                                   |
| S5  | XPac results for BUVCIG–BUVCOM pair. S4                                                                                                                                                   |
| S6  | XPac results for BUVCOM–BUVDIH pair. S4                                                                                                                                                   |
| S7  | XPac results for BUVDAZ–BUVDON pair. S5                                                                                                                                                   |
| S8  | XPac results for BUVDON–BUTQEO pair. S5                                                                                                                                                   |
| S9  | XPac results for BUVCUS–BUVDAZ pair. S6                                                                                                                                                   |
| S10 | XPac results for BUVCUS–BUTQEO pair. S6                                                                                                                                                   |
| S11 | Fingerprint plots showing the percentage contributions for individual atom–atom contacts. S7                                                                                              |
| S12 | View of the three-dimensional Hirshfeld surfaces mapped over shape-index for visualizing intermolecular C–H $\cdots\pi$ interactions. S8                                                  |
| S13 | Hirshfeld surfaces of BUVCOM (left) and BUVDUT (right) mapped over shape-index showing the ‘bow-tie’ patterns of touching red and blue triangles depicting $\pi\cdots\pi$ interaction. S8 |

# List of Tables

|     | pag.                                                                                                                                                                                                   |
|-----|--------------------------------------------------------------------------------------------------------------------------------------------------------------------------------------------------------|
| S1  | Total electrostatic energies $E_{\text{tot}}^{\text{elec}}$ (kJ/mol) <sup>a</sup> for dimers involving different types of contacts. S9                                                                 |
| S2  | Enrichment ratios $E_{XY}$ (reciprocal contacts merged) of intermolecular interactions. <sup>[a]</sup> S10                                                                                             |
| S3  | Calculated electrostatic potential ( $V_s$ ) (in kJ/mol) at the surface (isosurface 0.001 a.u) of <i>para</i> -substituted AOEB derivatives. S11                                                       |
| S4  | Topological properties (in a.u.) at the Bond Critical Point CP (3,−1) of selected intermolecular H $\cdots$ C interactions <sup>a</sup> S11                                                            |
| S5  | QTAIM dimerization energies ( $\Delta E$ ), H $\cdots$ C distances, and H-bond binding energy (BE) involving methylene and methine H-atoms for AOEB with C–H $\cdots\pi$ interactions (kJ/mol, Å). S12 |
| S6  | R factors and GoF values for five AOEB crystal structures S12                                                                                                                                          |
| S7  | Calculated energies and BSSE correction for five AOEB crystal structures S13                                                                                                                           |
| S8  | UFF optimized cartesian coordinates (Å) for Adamantane and Benzoic acid fragments S13                                                                                                                  |
| S9  | Selected NBO parameters for the C–H $\cdots\pi$ interactions in the experimental (BUVCIG) and idealized (Methylenic and Methinic) models. S14                                                          |
| S10 | BOILED-Egg plot and SwissADME properties for BUVCIG S15                                                                                                                                                |
| S11 | BOILED-Egg plot and SwissADME properties for BUVCOM S16                                                                                                                                                |
| S12 | BOILED-Egg plot and SwissADME properties for BUVCUS S17                                                                                                                                                |
| S13 | BOILED-Egg plot and SwissADME properties for BUVDAZ S18                                                                                                                                                |
| S14 | BOILED-Egg plot and SwissADME properties for BUVDIH S19                                                                                                                                                |
| S15 | BOILED-Egg plot and SwissADME properties for BUVDON S20                                                                                                                                                |
| S16 | BOILED-Egg plot and SwissADME properties for BUVDUT S21                                                                                                                                                |
| S17 | BOILED-Egg plot and SwissADME properties for BUTPUD S22                                                                                                                                                |
| S18 | BOILED-Egg plot and SwissADME properties for BUTQEO S23                                                                                                                                                |

# Figures

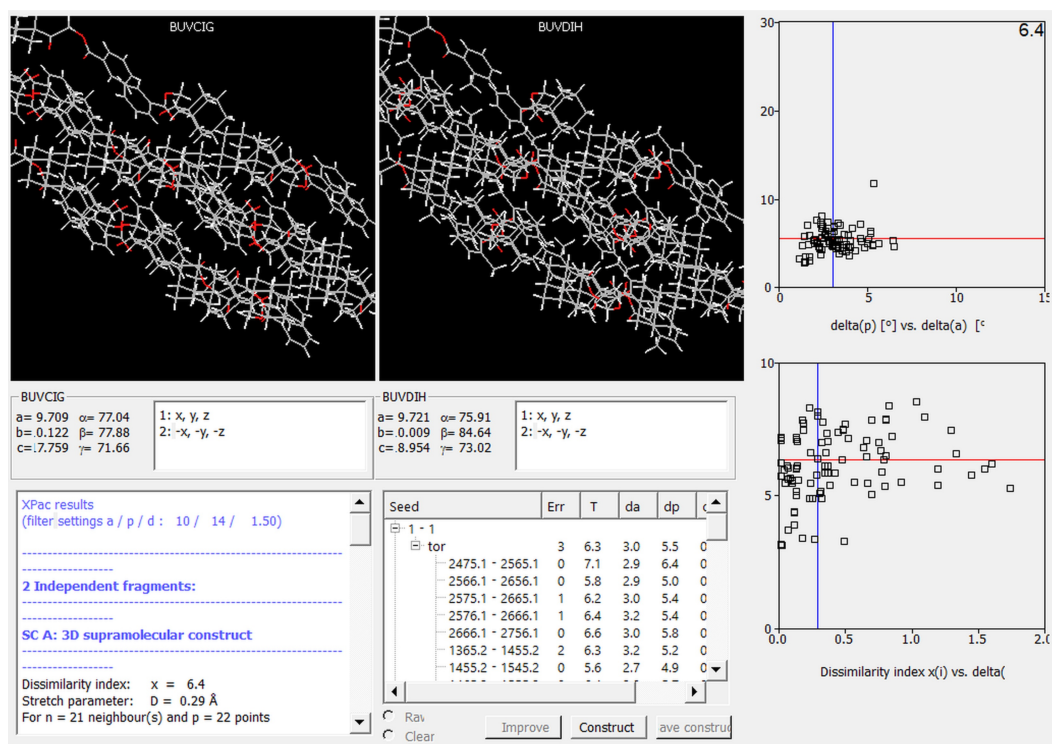

Figure S1. XPac results for BUVCI G-BUVDIH pair.

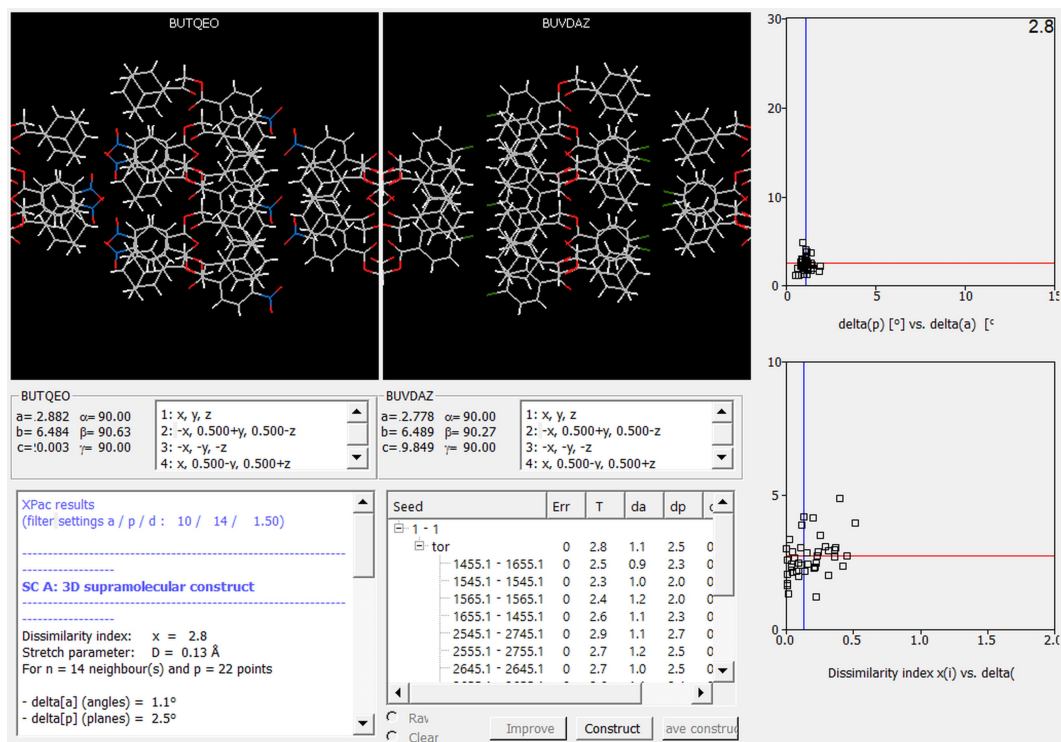

Figure S2. XPac results for BUVD AZ-BUTQEO pair.

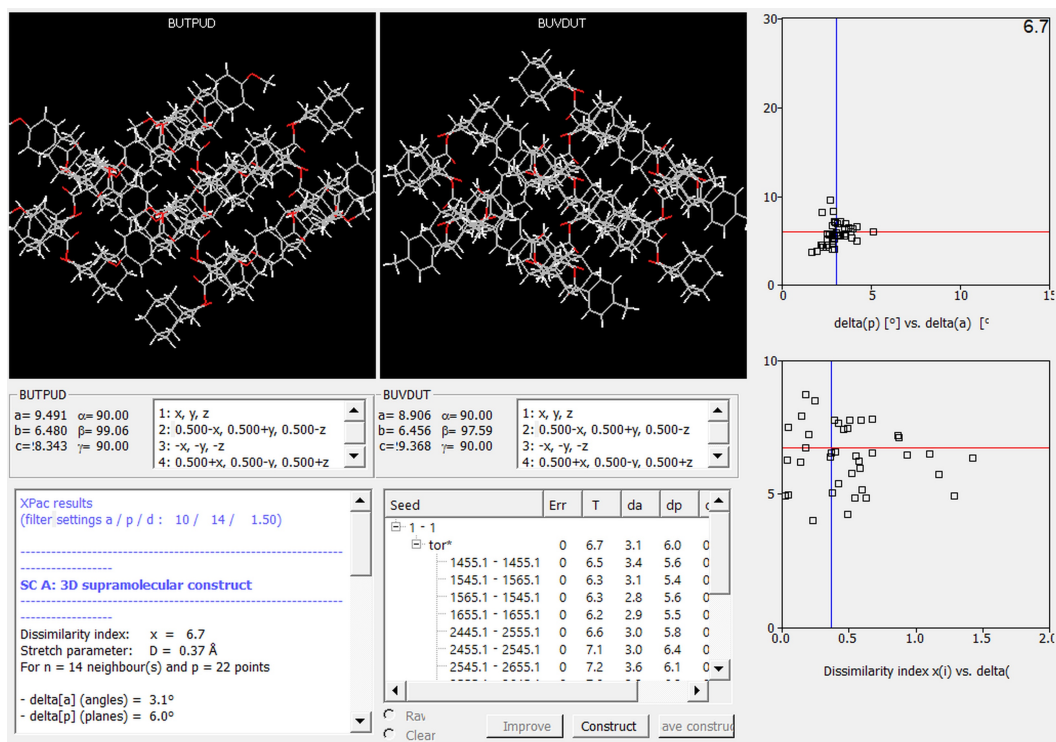

Figure S3. XPac results for BUVDUT–BUTPUD pair.

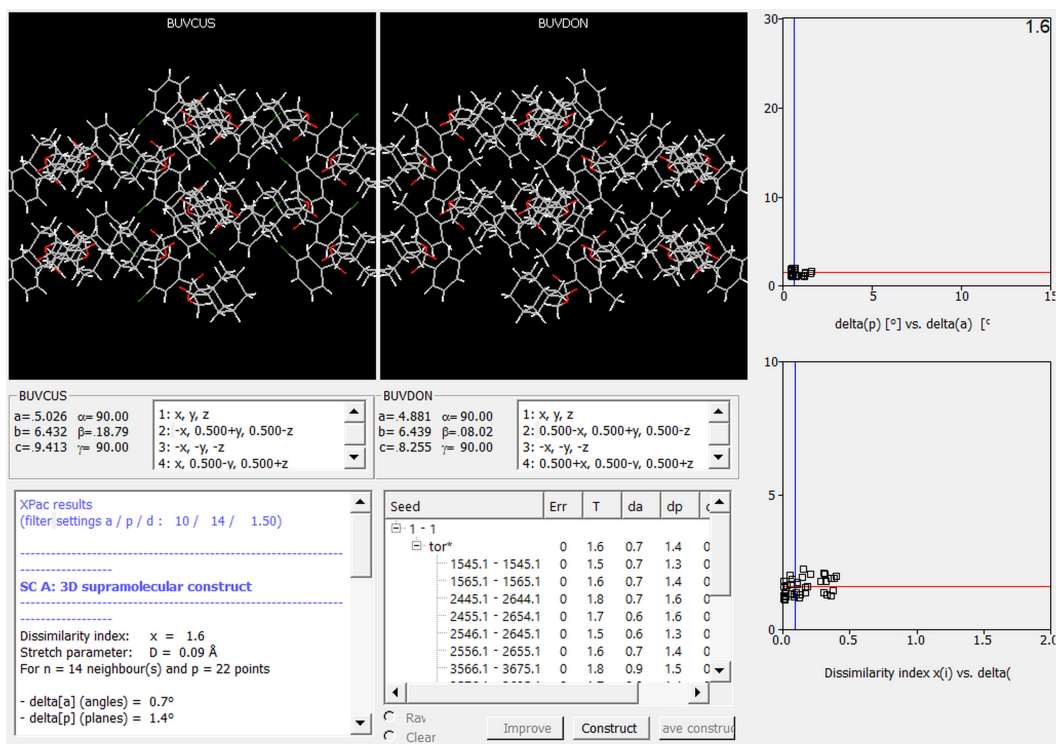

Figure S4. XPac results for BUVCUS–BUVDON pair.

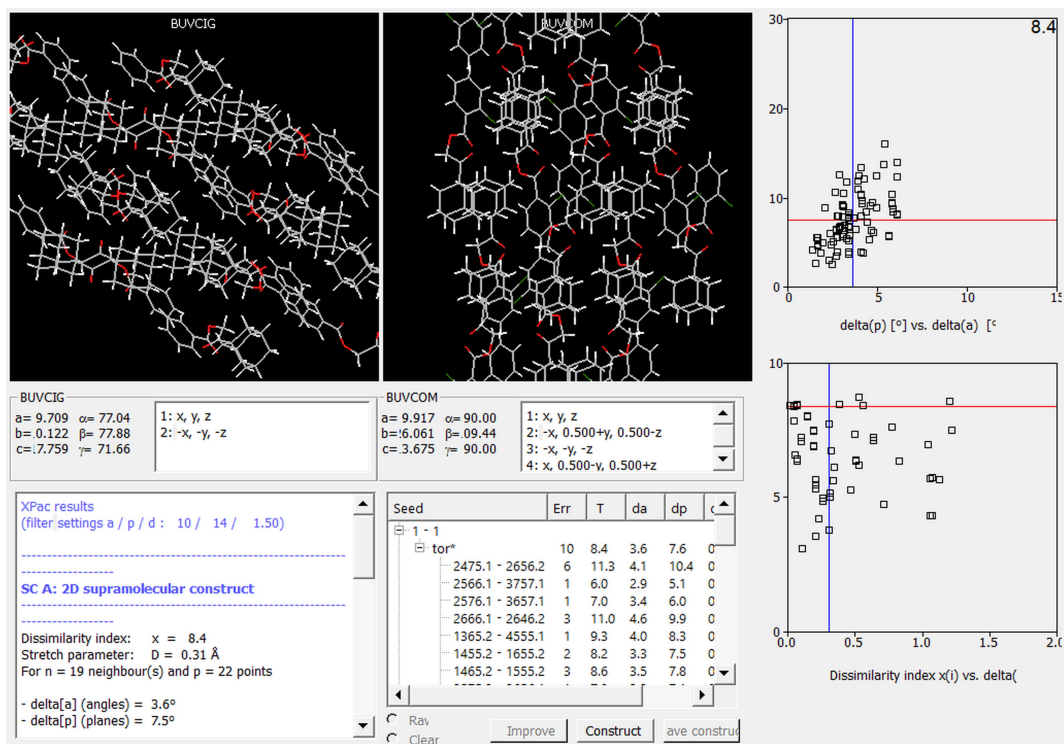

Figure S5. XPac results for BUVCIQ-BUVCOM pair.

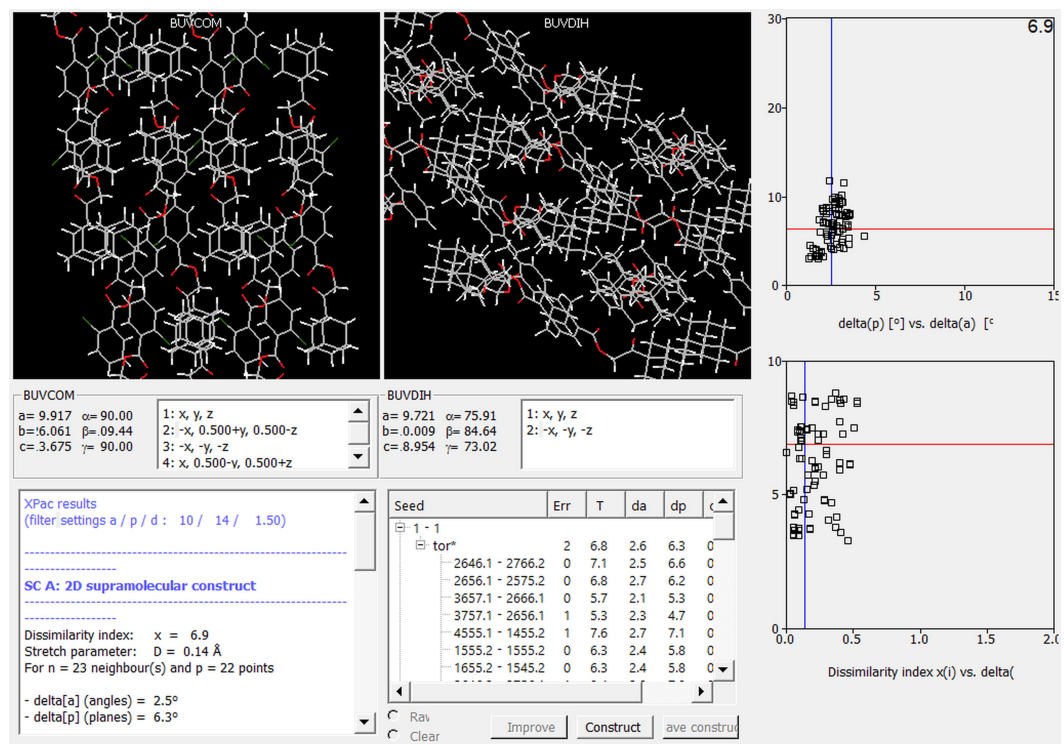

Figure S6. XPac results for BUVCOM-BUVDIH pair.

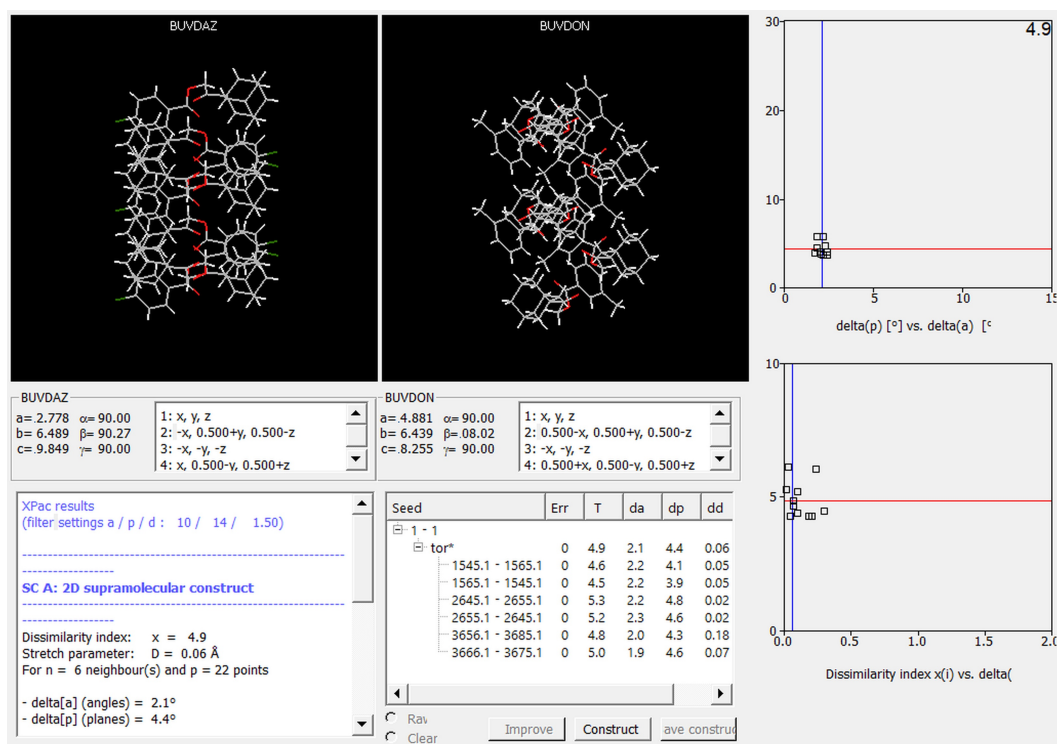

Figure S7. XPac results for BUVDAZ-BUVDON pair.

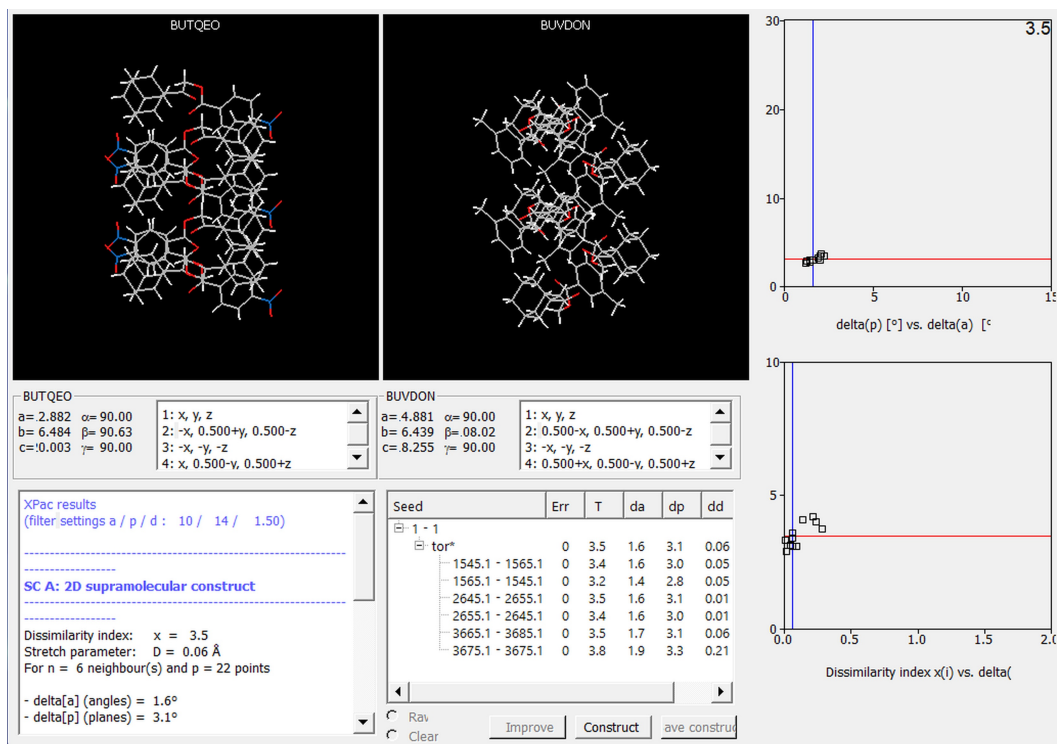

Figure S8. XPac results for BUVDON-BUTQEO pair.

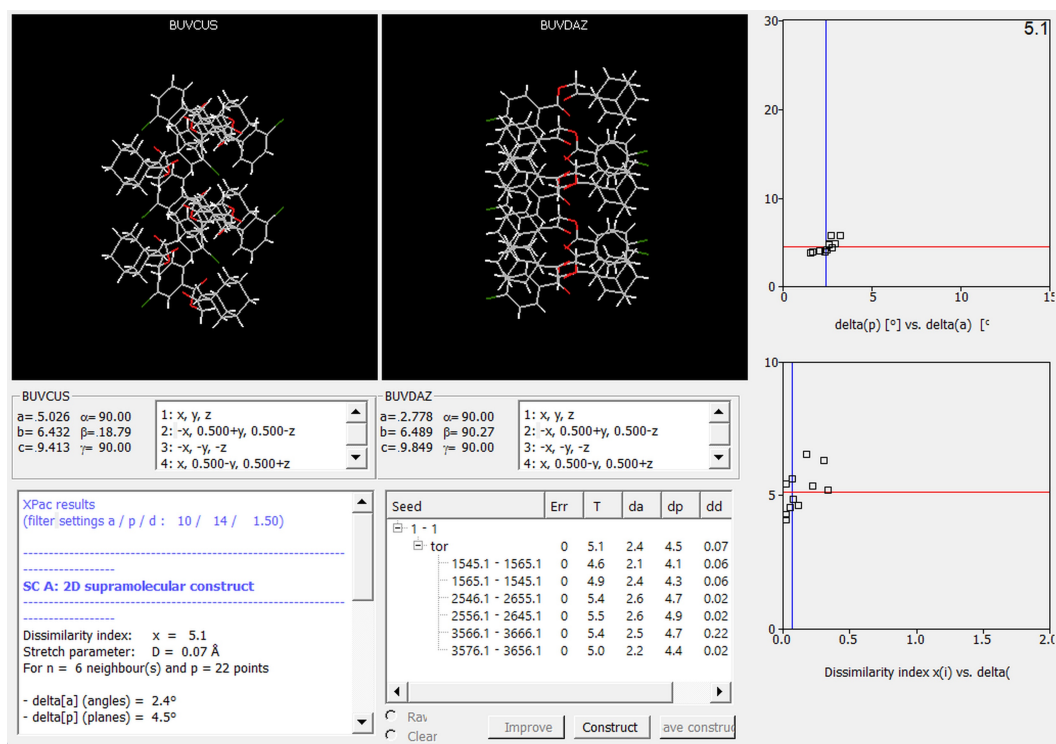

Figure S9. XPac results for BUVCUS-BUVDZ pair.

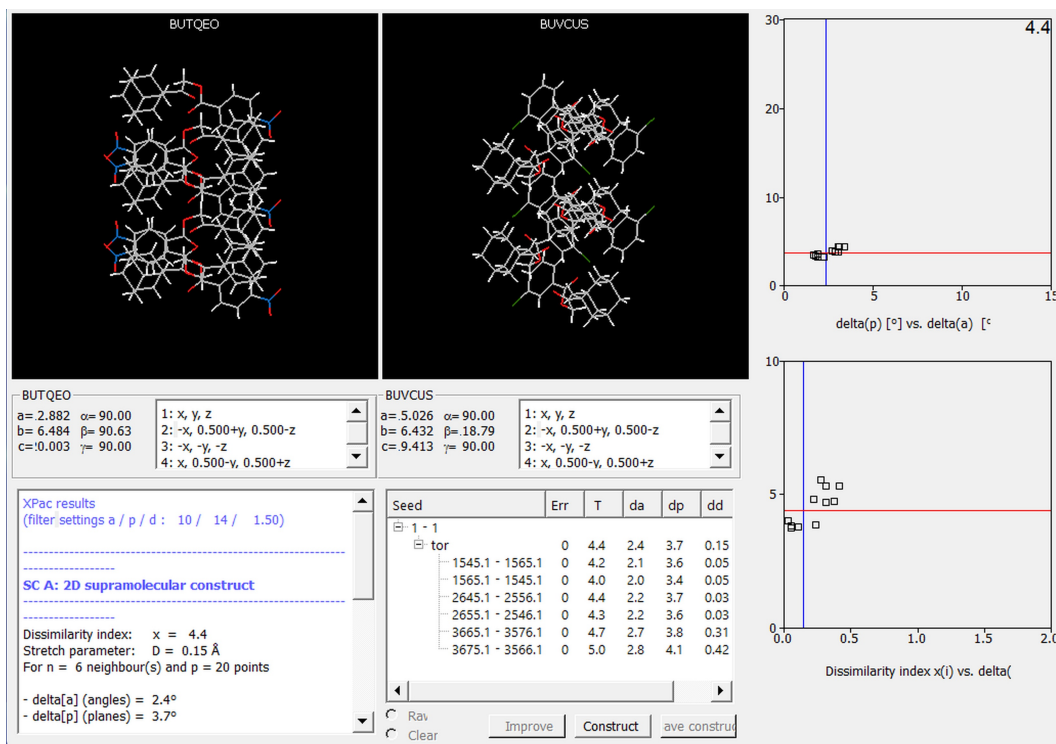

Figure S10. XPac results for BUVCUS-BUTQEO pair.

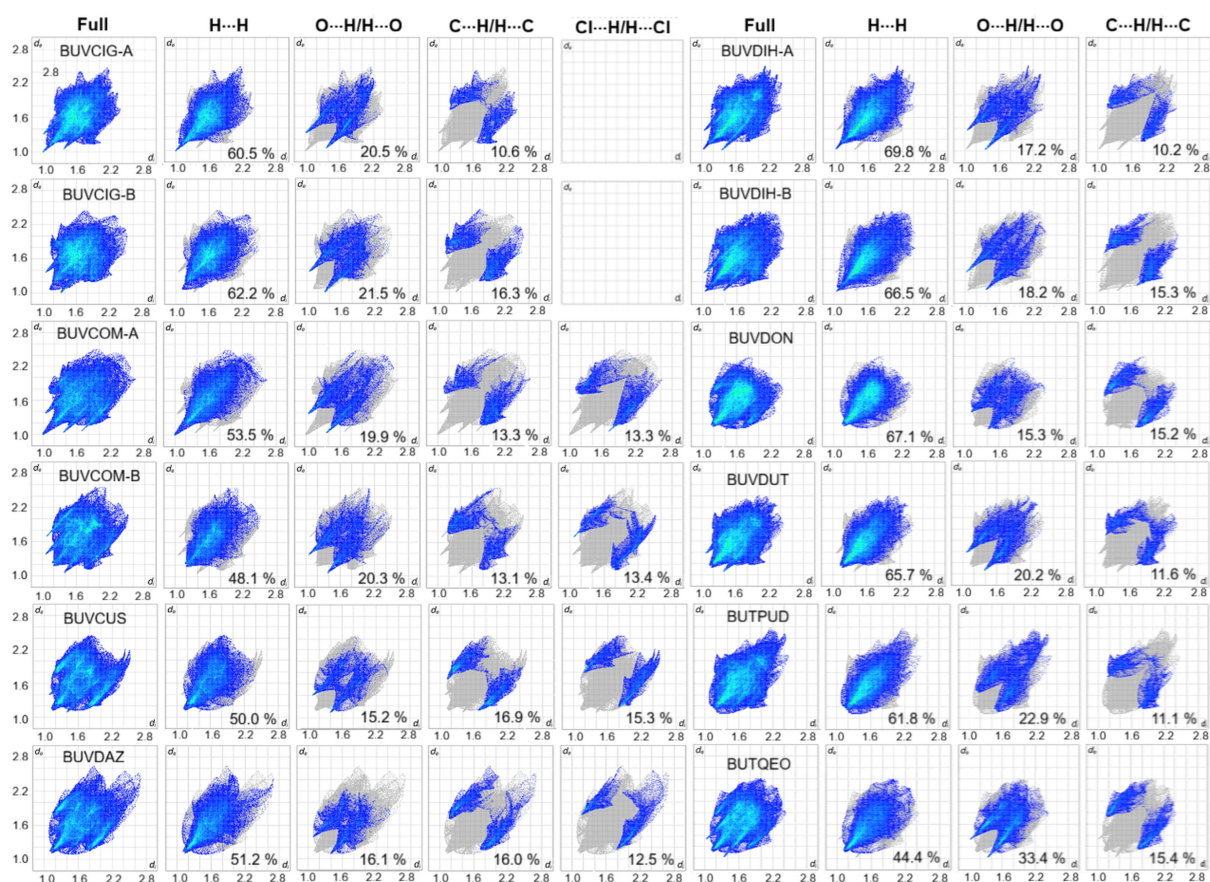

**Figure S11.** Fingerprint plots showing the percentage contributions for individual atom–atom contacts.

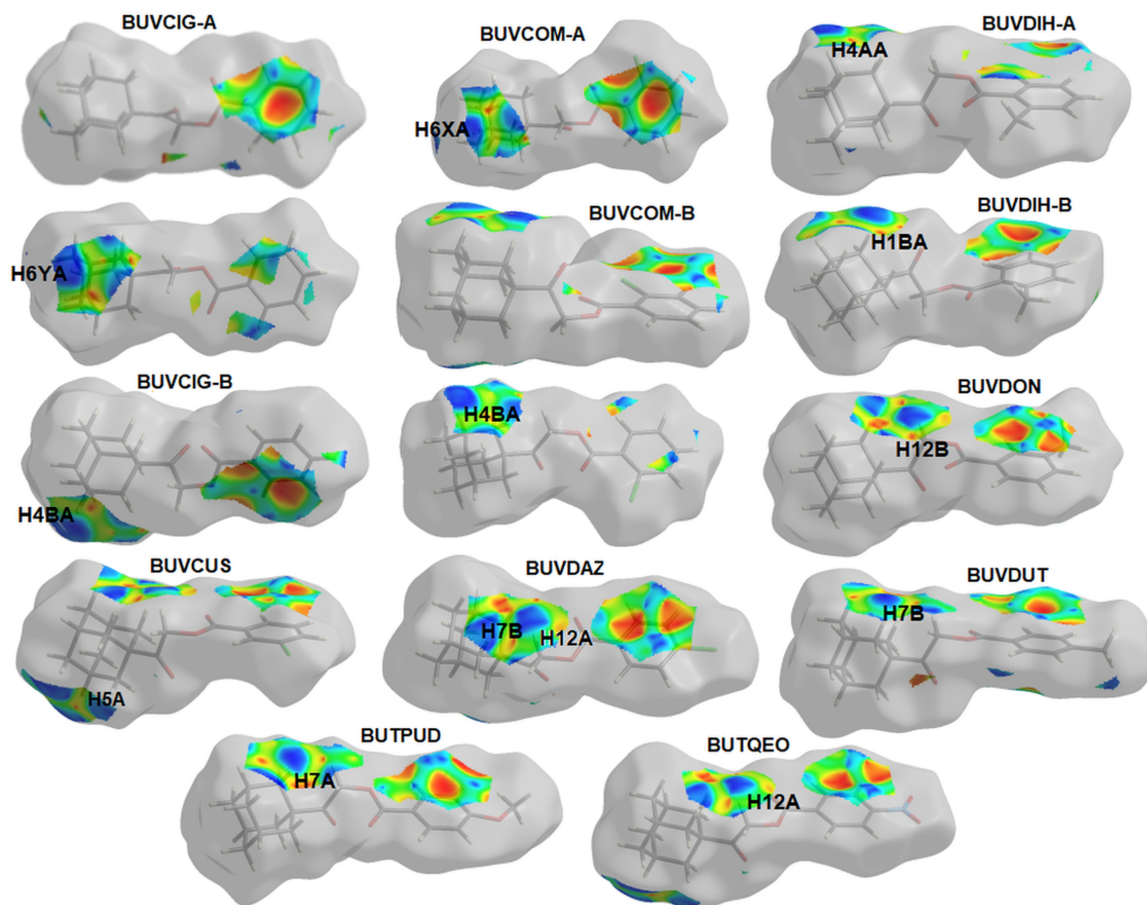

**Figure S12.** View of the three-dimensional Hirshfeld surfaces mapped over shape-index for visualizing intermolecular C-H $\cdots$  $\pi$  interactions.

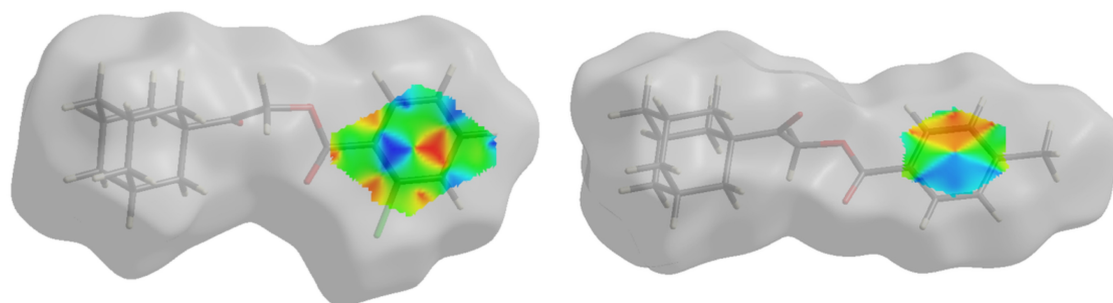

**Figure S13.** Hirshfeld surfaces of BUVCOM (left) and BUVDUT (right) mapped over shape-index showing the 'bow-tie' patterns of touching red and blue triangles depicting  $\pi\cdots\pi$  interaction.

## Tables

**Table S1.** Total electrostatic energies  $E_{\text{tot}}^{\text{elec}}$  (kJ/mol)<sup>a</sup> for dimers involving different types of contacts.

| Compound    | Dimer | Interactions | $E_{\text{tot}}$ | % <sup>b</sup> |
|-------------|-------|--------------|------------------|----------------|
| BUVCIG      | 1     | —            | 37.25            | —              |
|             |       | H12D···O2A   | 3.70             | 9.93           |
|             |       | H4BA···Cg5   | 8.22             | 22.07          |
|             | 2     | —            | 31.07            | —              |
|             |       | H6YA···Cg13  | 4.74             | 15.25          |
|             |       | H12B···O2B   | 6.29             | 20.24          |
| BUVCOM      | 1     | —            | 34.35            | —              |
|             |       | H12C···O2A   | 4.67             | 13.60          |
|             |       | H4BA···Cg5   | 4.39             | 12.78          |
|             | 2     | —            | 26.17            | —              |
|             |       | H18B···O3A   | 2.63             | 10.05          |
|             |       | H17B···Cl1A  | 5.16             | 19.72          |
| H9XA···Cl1B | 3.93  | 15.02        |                  |                |
| BUVDUT      | 1     | —            | 24.46            | —              |
|             |       | H20C···O2    | 4.29             | 17.54          |
|             |       | Cg5···Cg5    | 5.45             | 22.28          |

<sup>a</sup> Calculated by Charger tool of MoProViewer.

<sup>b</sup> Percentage of the total electrostatic energy of the dimer.

**Table S2.** Enrichment ratios  $E_{XY}$  (reciprocal contacts merged) of intermolecular interactions.<sup>[a]</sup>

| <b>BUVCIG–Mol A</b> |      |      |                |                |                | <b>BUVCIG–Mol B</b> |      |                |                |                |
|---------------------|------|------|----------------|----------------|----------------|---------------------|------|----------------|----------------|----------------|
|                     | H    | C    | O <sup>a</sup> | O <sup>b</sup> | O <sup>c</sup> | H                   | C    | O <sup>a</sup> | O <sup>b</sup> | O <sup>c</sup> |
| H                   | 1.01 | —    | —              | —              | —              | 0.89                | —    | —              | —              | —              |
| C                   | 0.91 | 1.49 | —              | —              | —              | 1.24                | 0.52 | —              | —              | —              |
| O <sup>a</sup>      | 1.06 | 0.85 | 0.00           | —              | —              | 1.34                | 0.29 | 0.00           | —              | —              |
| O <sup>b</sup>      | 1.32 | 0.33 | 0.00           | 0.00           | —              | 1.37                | 0.15 | 0.00           | 0.00           | —              |
| O <sup>c</sup>      | 1.13 | 0.90 | 0.00           | 0.00           | 0.00           | 1.32                | 0.36 | 0.00           | 0.00           | 0.00           |

  

| <b>BUVCOM–Mol A</b> |      |      |      |                | <b>BUVCOM–Mol B</b> |      |      |      |                |                |
|---------------------|------|------|------|----------------|---------------------|------|------|------|----------------|----------------|
|                     | H    | C    | Cl   | O <sup>a</sup> | O <sup>b</sup>      | H    | C    | Cl   | O <sup>a</sup> | O <sup>b</sup> |
| H                   | 0.87 | —    | —    | —              | —                   | 0.90 | —    | —    | —              | —              |
| C                   | 1.18 | 0.81 | —    | —              | —                   | 0.92 | 1.73 | —    | —              | —              |
| Cl                  | 1.31 | 0.60 | 0.00 | —              | —                   | 1.35 | 0.48 | 0.78 | —              | —              |
| O <sup>a</sup>      | 1.33 | 0.58 | 0.00 | 0.00           | —                   | 1.41 | 0.68 | 0.00 | 0.00           | —              |
| O <sup>b</sup>      | 1.42 | 0.25 | 0.14 | 0.00           | 0.00                | 1.60 | 0.18 | 0.00 | 0.00           | 0.00           |

  

| <b>BUVCUS</b>  |      |      |      |                | <b>BUVDAZ</b>  |      |      |      |                |                |
|----------------|------|------|------|----------------|----------------|------|------|------|----------------|----------------|
|                | H    | C    | Cl   | O <sup>a</sup> | O <sup>b</sup> | H    | C    | Cl   | O <sup>a</sup> | O <sup>b</sup> |
| H              | 0.85 | —    | —    | —              | —              | 0.89 | —    | —    | —              | —              |
| C              | 1.24 | 0.60 | —    | —              | —              | 1.18 | 0.73 | —    | —              | —              |
| Cl             | 1.45 | 0.43 | 0.00 | —              | —              | 1.11 | 0.49 | /    | —              | —              |
| O <sup>a</sup> | 1.22 | 0.78 | 0.00 | 0.00           | —              | 1.33 | 0.64 | 0.00 | 0.00           | —              |
| O <sup>b</sup> | 1.22 | 0.87 | 0.00 | 0.00           | /              | 1.29 | 0.74 | 0.00 | 0.00           | /              |

  

| <b>BUVDIH–Mol A</b> |      |      |                |                | <b>BUVDIH–Mol B</b> |      |      |                |                |                |
|---------------------|------|------|----------------|----------------|---------------------|------|------|----------------|----------------|----------------|
|                     | H    | C    | O <sup>a</sup> | O <sup>b</sup> | O <sup>c</sup>      | H    | C    | O <sup>a</sup> | O <sup>b</sup> | O <sup>c</sup> |
| H                   | 1.00 | —    | —              | —              | —                   | 0.92 | —    | —              | —              | —              |
| C                   | 0.88 | 1.71 | —              | —              | —                   | 1.18 | 0.59 | —              | —              | —              |
| O <sup>a</sup>      | 1.18 | 0.75 | 0.00           | —              | —                   | 1.20 | 1.20 | 1.20           | 1.20           | 1.20           |
| O <sup>b</sup>      | 1.33 | 0.14 | 0.00           | 0.00           | —                   | 1.28 | 0.36 | 0.00           | 0.00           | —              |
| O <sup>c</sup>      | 1.11 | 1.03 | 0.00           | 0.00           | 0.00                | 1.37 | 0.00 | 0.00           | 0.00           | 0.00           |

  

| <b>BUVDON</b>  |      |      |                |                | <b>BUVDUT</b>  |      |      |                |                |                |
|----------------|------|------|----------------|----------------|----------------|------|------|----------------|----------------|----------------|
|                | H    | C    | O <sup>a</sup> | O <sup>b</sup> | O <sup>c</sup> | H    | C    | O <sup>a</sup> | O <sup>b</sup> | O <sup>c</sup> |
| H              | 0.98 | —    | —              | —              | —              | 0.99 | —    | —              | —              | —              |
| C              | 1.09 | 0.66 | —              | —              | —              | 0.91 | 1.61 | —              | —              | —              |
| O <sup>a</sup> | 1.10 | 0.75 | 0.00           | —              | —              | 1.10 | 0.93 | /              | —              | —              |
| O <sup>b</sup> | 1.15 | 0.72 | 0.00           | /              | —              | 1.38 | 0.03 | 0.00           | 0.00           | —              |
| O <sup>c</sup> | 0.94 | 0.54 | /              | 0.00           | 0.00           | 1.19 | 0.80 | 0.00           | 0.00           | 0.00           |

  

| <b>BUTPUD</b>  |      |      |                |                | <b>BUTQEO</b>  |      |      |      |                |                |
|----------------|------|------|----------------|----------------|----------------|------|------|------|----------------|----------------|
|                | H    | C    | O <sup>a</sup> | O <sup>b</sup> | O <sup>c</sup> | H    | C    | N    | O <sup>a</sup> | O <sup>b</sup> |
| H              | 0.99 | —    | —              | —              | —              | 0.87 | —    | —    | —              | —              |
| C              | 0.90 | 1.63 | —              | —              | —              | 1.17 | 0.87 | —    | —              | —              |
| O <sup>a</sup> | 1.27 | 0.62 | 0.00           | —              | —              | 0.82 | 0.10 | /    | —              | —              |
| O <sup>b</sup> | 1.20 | 0.56 | 0.00           | /              | —              | 1.31 | 0.86 | 0.00 | 0.00           | —              |
| O <sup>c</sup> | 1.35 | 0.31 | /              | 0.00           | 0.00           | 1.30 | 0.88 | 0.00 | 0.00           | /              |

<sup>[a]</sup>  $E_{XY}$  values lower than 1.0% were not reported (/), as they are not meaningful. O<sup>a</sup>, O<sup>b</sup>, O<sup>c</sup>, O<sup>d</sup>, and O<sup>e</sup> are oxygen ester O=C, oxygen ketone O=C, oxygen ester O–C, oxygen ether O–C, and oxygen O=N, respectively.

**Table S3.** Calculated electrostatic potential ( $V_s$ ) (in kJ/mol) at the surface (isosurface 0.001 a.u.) of *para*-substituted AOEB derivatives.

| Compound | $R$              | $V^a$  | $V^b$  | $V^c$  | $V^d$  | $V^e$ | $V_R^f$ |
|----------|------------------|--------|--------|--------|--------|-------|---------|
| BUVCIG   | H                | -149.8 | -159.0 | -129.0 | +90.5  | -61.5 | —       |
| BUTQEO   | NO <sub>2</sub>  | -107.4 | -133.0 | -104.7 | +106.3 | -5.9  | -132.1  |
|          | —                | —      | —      | —      | —      | —     | -132.9  |
| BUTPUD   | OCH <sub>3</sub> | -152.9 | -163.6 | -140.2 | +84.5  | -89.1 | -105.4  |
| BUVDUT   | CH <sub>3</sub>  | -149.5 | -160.9 | -139.8 | +87.9  | -67.6 | -90.3   |
| BUVDAZ   | Cl               | -148.5 | -129.5 | -49.6  | +101.5 | -35.8 | -71.8   |

<sup>a</sup>benzoate carbonyl oxygen; <sup>b</sup>carbonyl oxygen adjacent to adamantane; <sup>c</sup>ester ether oxygen; <sup>d</sup>methylene bridge; <sup>e</sup>phenyl ring face; <sup>f</sup>substituent group  $R$ .

**Table S4.** Topological properties (in a.u.) at the Bond Critical Point CP (3,−1) of selected intermolecular H···C interactions<sup>a</sup>

| #CP           | Interaction | $\rho \times 10^3$ | $\nabla^2\rho \times 10^3$ | $G(r) \times 10^3$ | $V(r) \times 10^3$ | $G(r)/ V(r) $ |
|---------------|-------------|--------------------|----------------------------|--------------------|--------------------|---------------|
| <b>BUVCIG</b> |             |                    |                            |                    |                    |               |
| 58            | H7YA···C19B | 5.08               | 13.74                      | 2.89               | -2.35              | 1.23          |
| 82            | H6YA···C16B | 4.47               | 12.05                      | 2.61               | -2.20              | 1.18          |
| 66            | H9BB···C19A | 6.37               | 17.95                      | 3.77               | -3.06              | 1.23          |
| 85            | H4BA···C16A | 5.22               | 14.79                      | 3.21               | -2.72              | 1.18          |
| <b>BUVCOM</b> |             |                    |                            |                    |                    |               |
| 60            | H7B···C14   | 6.01               | 17.72                      | 3.80               | -3.17              | 1.20          |
| <b>BUVCUS</b> |             |                    |                            |                    |                    |               |
| 67            | H7YA···C19B | 5.90               | 15.61                      | 3.36               | -2.81              | 1.20          |
| 52            | H6YA···C16B | 4.90               | 12.60                      | 2.69               | -2.22              | 1.21          |
| <b>BUVDAZ</b> |             |                    |                            |                    |                    |               |
| 79            | H7B···C17   | 4.98               | 13.37                      | 2.88               | -2.41              | 1.19          |
| <b>BUVDIH</b> |             |                    |                            |                    |                    |               |
| 70            | H7B···C14   | 5.53               | 15.02                      | 3.22               | -2.68              | 1.20          |
| <b>BUVDON</b> |             |                    |                            |                    |                    |               |
| 76            | H7YA···C19B | 6.02               | 15.59                      | 3.37               | -2.83              | 1.19          |
| 65            | H6YA···C16B | 4.72               | 12.09                      | 2.59               | -2.15              | 1.20          |
| <b>BUVDUT</b> |             |                    |                            |                    |                    |               |
| 83            | H7B···C14   | 5.34               | 14.12                      | 3.01               | -2.49              | 1.21          |
| <b>BUTPUD</b> |             |                    |                            |                    |                    |               |
| 87            | H5A···C18   | 5.51               | 13.67                      | 2.96               | -2.50              | 1.18          |
| 79            | H7A···C15   | 5.36               | 14.78                      | 3.16               | -2.63              | 1.20          |
| <b>BUTQEO</b> |             |                    |                            |                    |                    |               |
| 78            | H5A···C18   | 5.46               | 14.12                      | 3.00               | -2.46              | 1.22          |
| 77            | H7A···C15   | 4.28               | 11.26                      | 2.39               | -1.97              | 1.22          |

<sup>a</sup> All values are in atomic units (a.u.). Factors of  $10^3$  are applied to the raw data for clarity.  $G(r)$  is the kinetic energy density and  $V(r)$  is the potential energy density.

**Table S5.** QTAIM dimerization energies ( $\Delta E$ ), H $\cdots$ C distances, and H-bond binding energy (BE) involving methylene and methine H-atoms for AOEB with C–H $\cdots$  $\pi$  interactions (kJ/mol, Å).

| Compound        | Symmetry           | Interactions       | $\Delta E$ | H $\cdots$ C <sup>[a]</sup> | BE <sup>[b]</sup> | H $\cdots$ C <sup>[c]</sup> | BE <sup>[d]</sup> |
|-----------------|--------------------|--------------------|------------|-----------------------------|-------------------|-----------------------------|-------------------|
| BUVCIG          | $-1 + x, 1 + y, z$ | H7YA $\cdots$ C19B | -15.56     | 2.953                       | -1.40             | —                           | —                 |
|                 |                    | H6YA $\cdots$ C17B | —          | —                           | —                 | 3.063                       | -1.03             |
|                 | $1 + x, y, z$      | H9BB $\cdots$ C19A | -17.03     | 2.850                       | -2.46             | —                           | —                 |
|                 |                    | H4BA $\cdots$ C16A | —          | —                           | —                 | 2.973                       | -1.68             |
|                 |                    | H3BB $\cdots$ C18A | —          | 3.073                       | -0.68             | —                           | —                 |
| BUVCOM          | $x, y, z$          | H4BA $\cdots$ C19B | -20.00     | 2.954                       | -1.67             | —                           | —                 |
|                 |                    | H5BB $\cdots$ C18A | —          | 3.082                       | -0.51             | —                           | —                 |
|                 |                    | H4BA $\cdots$ C19B | —          | —                           | —                 | 3.103                       | -0.78             |
| BUVDIH          | $x, y, z$          | H9AA $\cdots$ C14B | -18.79     | 2.996                       | -1.60             | —                           | —                 |
|                 |                    | H4AA $\cdots$ C16B | —          | —                           | —                 | 3.102                       | -0.82             |
| BUVDUT          | $1-x, 1-y, -z$     | H5B $\cdots$ C18   | -17.78     | 2.897                       | -1.75             | —                           | —                 |
|                 |                    | H7B $\cdots$ C19   | —          | 3.017                       | -1.05             | —                           | —                 |
| BUTPUD          | $-x, 2-y, -z$      | H5A $\cdots$ C18   | -18.49     | 2.905                       | -2.03             | —                           | —                 |
|                 |                    | H7B $\cdots$ C19   | —          | 2.965                       | -1.90             | —                           | —                 |
| Model-methylene | Vacuum             | —                  | -12.1      | —                           | —                 | —                           | —                 |
| Model-methine   | Vacuum             | —                  | -10.8      | —                           | —                 | —                           | —                 |

<sup>[a]</sup> Methylene H-atom. <sup>[b]</sup> H-bond binding energy for methylene H-atom. <sup>[c]</sup> Methine H-atom. <sup>[d]</sup> H-bond binding energy for methine H-atom.

**Table S6.** R factors and GoF values for five AOEB crystal structures

| Compound | $R_{all}^{[a]}$ | $R_{gt}^{[b]}$ | $wR_{ref}^{[c]}$ | $wR_{gt}^{[d]}$ | GoF <sup>[e]</sup> |
|----------|-----------------|----------------|------------------|-----------------|--------------------|
| BUVCIG   | 0.0845          | 0.0650         | 0.2415           | 0.2159          | 1.031              |
| BUVCOM   | 0.1599          | 0.0633         | 0.2155           | 0.1645          | 1.010              |
| BUVDIH   | 0.0839          | 0.0652         | 0.2181           | 0.1943          | 1.027              |
| BUVDUT   | 0.0639          | 0.0439         | 0.1311           | 0.1165          | 1.073              |
| BUTPUD   | 0.0698          | 0.0538         | 0.1772           | 0.1576          | 1.041              |

<sup>[a]</sup> $R_{all}$ : R-factor based on all reflections; <sup>[b]</sup> $R_{gt}$ : R-factor for reflections with  $I > 2\sigma(I)$ ; <sup>[c]</sup> $wR_{ref}$ : weighted R-factor based on all reflections used in refinement; <sup>[d]</sup> $wR_{gt}$ : weighted R-factor for reflections with  $I > 2\sigma(I)$ ; <sup>[e]</sup>GoF: Goodness-of-Fit on  $F^2$ .

**Table S7.** Calculated energies and BSSE correction for five AOEB crystal structures

| Compound        | $E_{RB3LYP}^{[a]}$ | $E_{CP}^{[b]}$ | $E_{BSSE}^{[c]}$ | $\sum E_{frag}^{[d]}$ | $\Delta E_{raw}^{[e]}$ | $\Delta E_{corr}^{[f]}$ |
|-----------------|--------------------|----------------|------------------|-----------------------|------------------------|-------------------------|
| BUVCIG          | -264,091.95        | -509,321.32    | 1.64             | -509,317.25           | -5.70                  | -4.07                   |
| BUVCOM          | -552,488.08        | -797,718.28    | 1.42             | -797,713.51           | -6.19                  | -4.78                   |
| BUVDIH          | -288,762.99        | -533,992.88    | 1.37             | -533,988.40           | -5.86                  | -4.49                   |
| BUVDUT          | -288,769.49        | -534,000.77    | 1.24             | -533,996.52           | -5.49                  | -4.25                   |
| BUTPUD          | -335,953.60        | -581,185.00    | 1.50             | -581,180.57           | -5.93                  | -4.42                   |
| Model-methylene | -264,094.37        | -509,327.46    | 0.82             | -509,324.85           | -3.43                  | -2.61                   |
| Model-methine   | -264,094.37        | -509,327.36    | 0.64             | -509,324.77           | -3.23                  | -2.59                   |

All energy values are reported in kcal/mol.

<sup>[a]</sup> $E_{RB3LYP}$ : Total energy (RB3LYP level); <sup>[b]</sup> $E_{CP}$ : Counterpoise corrected total energy; <sup>[c]</sup> $E_{BSSE}$ : Basis Set Superposition Error energy; <sup>[d]</sup> $\sum E_{frag}$ : Sum of individual fragment energies; <sup>[e]</sup> $\Delta E_{raw}$ : Complexation energy (raw); <sup>[f]</sup> $\Delta E_{corr}$ : Complexation energy (BSSE corrected).

**Table S8.** UFF optimized cartesian coordinates (Å) for Adamantane and Benzoic acid fragments

| Adamantane Fragment |          |          |          | Benzoic acid Fragment |          |          |          |
|---------------------|----------|----------|----------|-----------------------|----------|----------|----------|
| Atom                | X        | Y        | Z        | Atom                  | X        | Y        | Z        |
| C                   | -0.25501 | -0.02097 | 1.04239  | C                     | 3.21010  | 0.54939  | -0.03397 |
| C                   | 0.08724  | -1.22430 | 0.14632  | C                     | 2.33534  | -0.53244 | 0.06998  |
| C                   | -1.02470 | -1.44080 | -0.89521 | C                     | 0.95573  | -0.31713 | 0.08846  |
| C                   | -2.35526 | -1.70051 | -0.16703 | C                     | 0.44963  | 0.98564  | 0.00262  |
| C                   | -2.71143 | -0.49987 | 0.72721  | C                     | -1.00524 | 1.26536  | 0.01819  |
| C                   | -2.83778 | 0.76071  | -0.14633 | C                     | 1.33225  | 2.06835  | -0.10173 |
| C                   | -1.50995 | 1.03443  | -0.87436 | C                     | 2.71063  | 1.84895  | -0.11984 |
| C                   | -0.39527 | 1.23689  | 0.16708  | O                     | -1.52153 | 2.36545  | -0.05234 |
| C                   | -1.16062 | -0.17490 | -1.75956 | O                     | -1.75192 | 0.15165  | 0.12171  |
| C                   | -1.58995 | -0.28871 | 1.75957  | H                     | 4.28389  | 0.37889  | -0.04807 |
| H                   | 0.53958  | 0.12858  | 1.78175  | H                     | 2.72679  | -1.54445 | 0.13681  |
| H                   | 1.04572  | -1.05398 | -0.35924 | H                     | 0.28517  | -1.16896 | 0.16990  |
| H                   | 0.20640  | -2.12590 | 0.75966  | H                     | -2.67270 | 0.48770  | 0.11950  |
| H                   | -0.77604 | -2.29833 | -1.53020 | H                     | 0.94836  | 3.08429  | -0.16905 |
| H                   | -3.15467 | -1.87299 | -0.89810 | H                     | 3.39343  | 2.69124  | -0.20081 |
| H                   | -2.27791 | -2.61024 | 0.44099  |                       |          |          |          |
| H                   | -3.65917 | -0.69000 | 1.24301  |                       |          |          |          |
| H                   | -3.64543 | 0.63039  | -0.87707 |                       |          |          |          |
| H                   | -3.10773 | 1.62233  | 0.47657  |                       |          |          |          |
| H                   | -1.60546 | 1.93257  | -1.49454 |                       |          |          |          |
| H                   | -0.62342 | 2.10665  | 0.79537  |                       |          |          |          |
| H                   | 0.55496  | 1.44931  | -0.33810 |                       |          |          |          |
| H                   | -0.22350 | 0.01336  | -2.29774 |                       |          |          |          |
| H                   | -1.93960 | -0.32122 | -2.51787 |                       |          |          |          |
| H                   | -1.49955 | -1.17430 | 2.40053  |                       |          |          |          |
| H                   | -1.83854 | 0.55495  | 2.41509  |                       |          |          |          |

**Table S9.** Selected NBO parameters for the C–H··· $\pi$  interactions in the experimental (BUVCIG) and idealized (Methylenic and Methinic) models.

| <b>Model</b>      | <b>Donor</b>                           | <b>Acceptor</b>                              | <b>Occup.<sup>a</sup></b> | <b><math>E^{(2)}</math> <sup>b</sup></b> |
|-------------------|----------------------------------------|----------------------------------------------|---------------------------|------------------------------------------|
| <b>BUVCIG</b>     | $\pi(\text{C}=\text{C})_{\text{ring}}$ | $\sigma^*(\text{C}-\text{H})_{\text{methy}}$ | 0.017                     | 7.70                                     |
|                   | $\pi(\text{C}=\text{C})_{\text{ring}}$ | $\sigma^*(\text{C}-\text{H})_{\text{methi}}$ | 0.014                     | 5.06                                     |
| <b>Methylenic</b> | $\pi(\text{C}=\text{C})_{\text{ring}}$ | $\sigma^*(\text{C}-\text{H})_{\text{methy}}$ | 0.015                     | 6.53                                     |
| <b>Methinic</b>   | $\pi(\text{C}=\text{C})_{\text{ring}}$ | $\sigma^*(\text{C}-\text{H})_{\text{methi}}$ | 0.012                     | 4.10                                     |

<sup>a</sup> Occupancy of the antibonding orbital  $\sigma^*$  (units in  $e^-$ ).

<sup>b</sup> Second-order perturbation stabilization energy in kJ/mol (1 kcal/mol = 4.184 kJ/mol).

**Table S10.** BOILED-Egg plot and SwissADME properties for BUVCIG

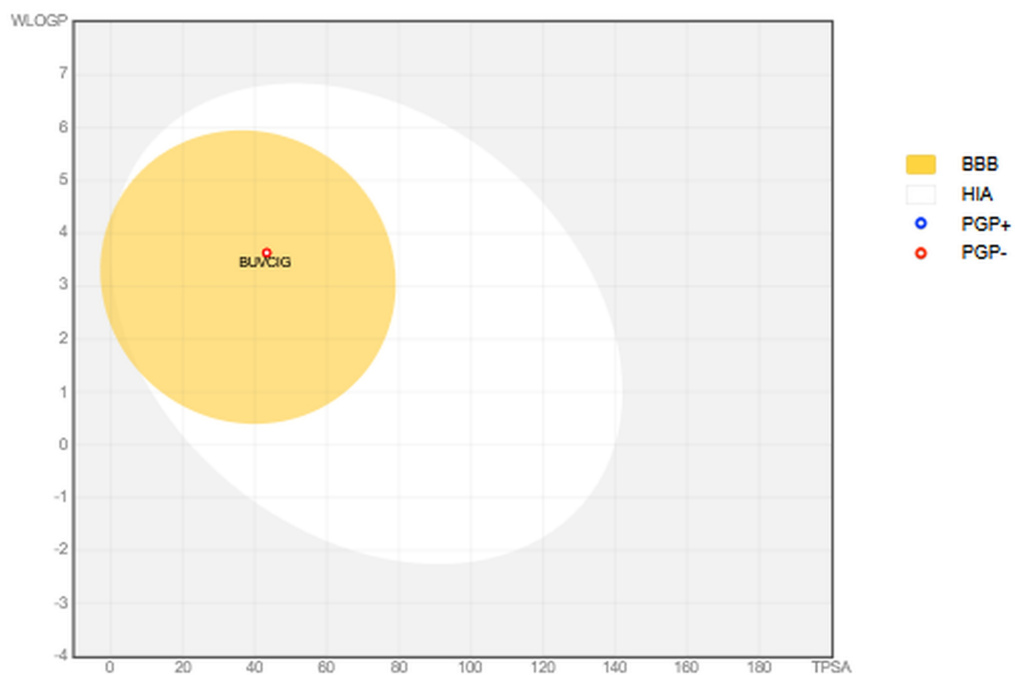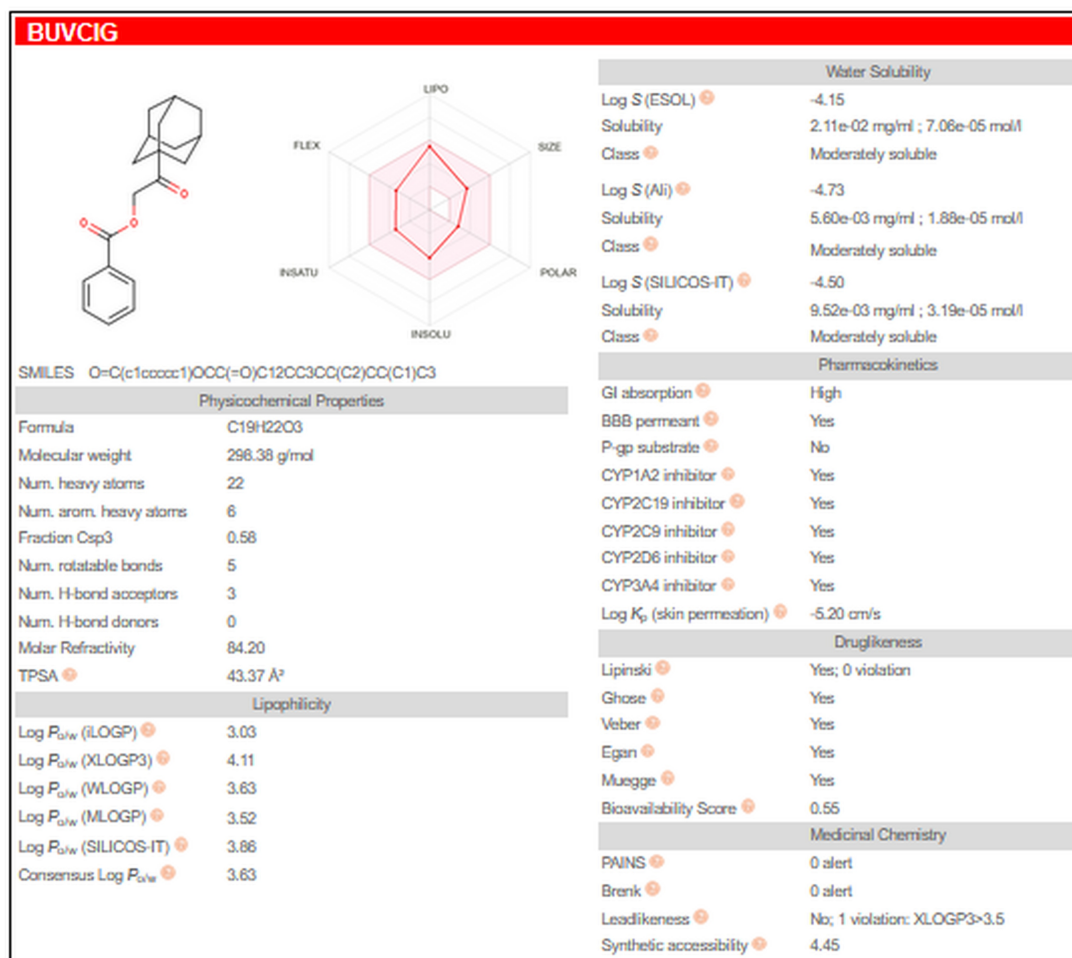

**Table S11.** BOILED-Egg plot and SwissADME properties for BUVCOM

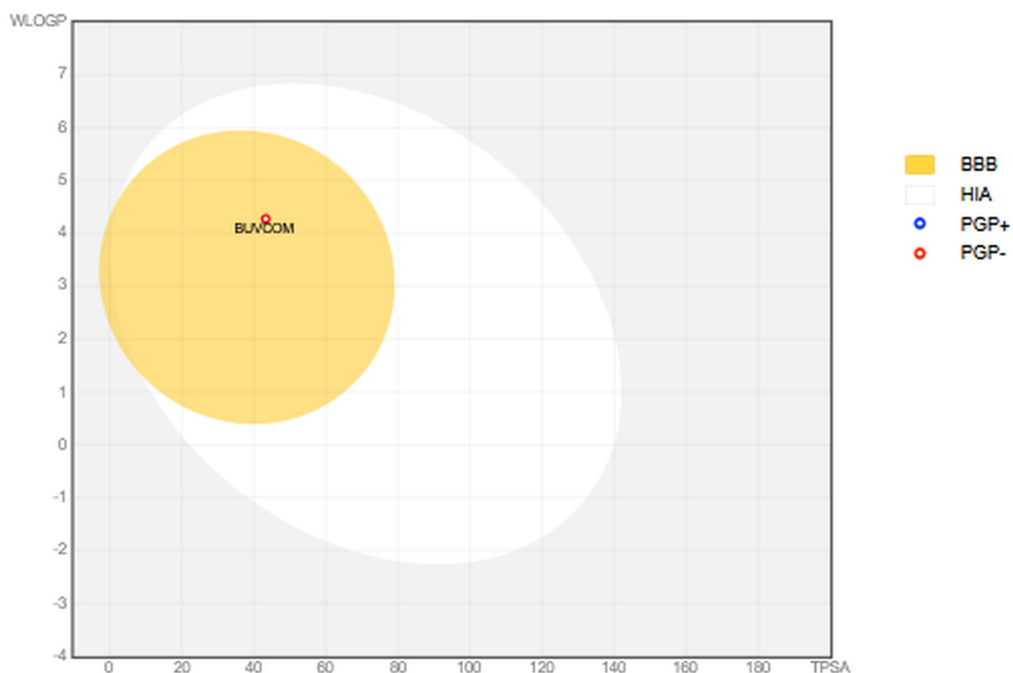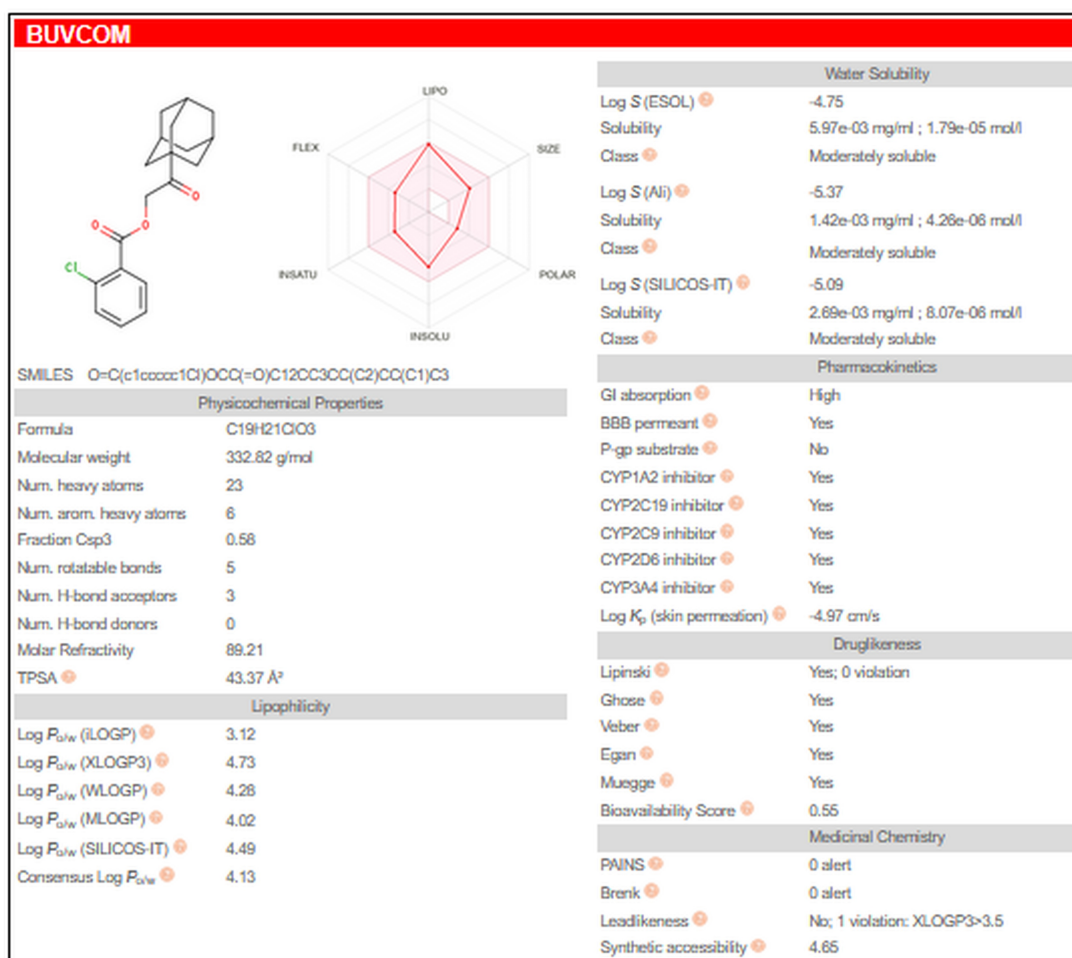

**Table S12.** BOILED-Egg plot and SwissADME properties for BUVCUS

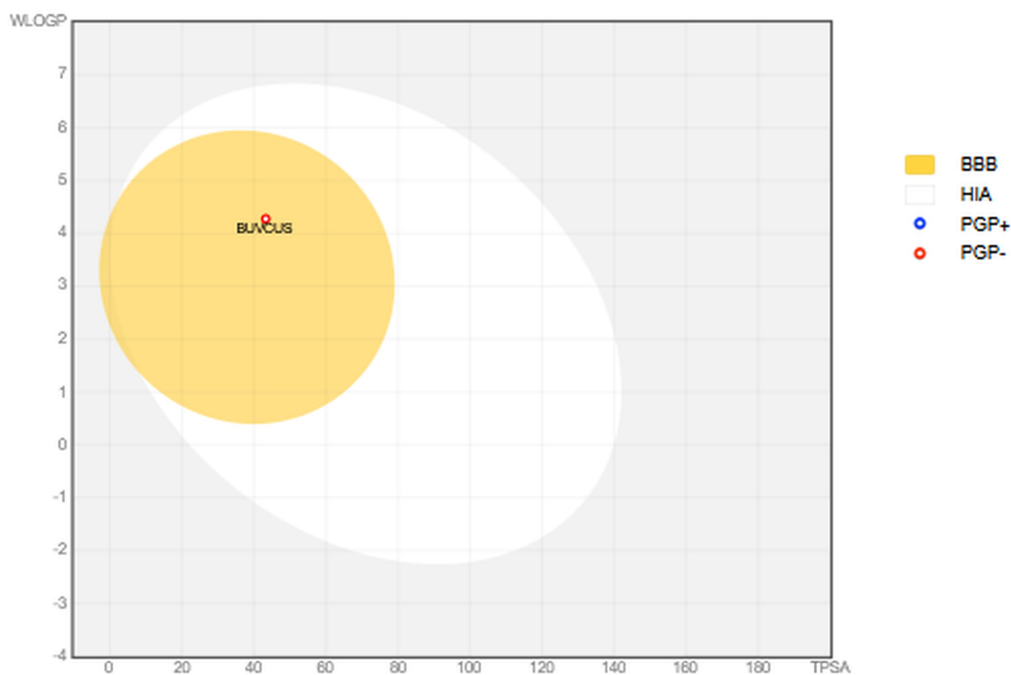

| BUVCUS                                                                              |                                                  |
|-------------------------------------------------------------------------------------|--------------------------------------------------|
| 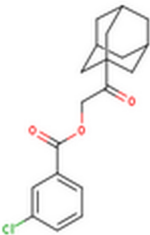 |                                                  |
|  |                                                  |
| <b>SMILES</b> <chem>Clc1ccccc1C(=O)OCC(=O)C12CC3CC(C2)CC(C1)C3</chem>               |                                                  |
| Physicochemical Properties                                                          |                                                  |
| Formula                                                                             | C <sub>19</sub> H <sub>21</sub> ClO <sub>3</sub> |
| Molecular weight                                                                    | 332.82 g/mol                                     |
| Num. heavy atoms                                                                    | 23                                               |
| Num. arom. heavy atoms                                                              | 6                                                |
| Fraction Csp <sup>3</sup>                                                           | 0.58                                             |
| Num. rotatable bonds                                                                | 5                                                |
| Num. H-bond acceptors                                                               | 3                                                |
| Num. H-bond donors                                                                  | 0                                                |
| Molar Refractivity                                                                  | 89.21                                            |
| TPSA                                                                                | 43.37 Å <sup>2</sup>                             |
| Lipophilicity                                                                       |                                                  |
| Log P <sub>ow</sub> (ILOGP)                                                         | 3.34                                             |
| Log P <sub>ow</sub> (XLOGP3)                                                        | 4.73                                             |
| Log P <sub>ow</sub> (WLOGP)                                                         | 4.28                                             |
| Log P <sub>ow</sub> (MLOGP)                                                         | 4.02                                             |
| Log P <sub>ow</sub> (SILICOS-IT)                                                    | 4.49                                             |
| Consensus Log P <sub>ow</sub>                                                       | 4.17                                             |
| Water Solubility                                                                    |                                                  |
| Log S (ESOL)                                                                        | -4.75                                            |
| Solubility                                                                          | 5.97e-03 mg/ml ; 1.79e-05 mol/l                  |
| Class                                                                               | Moderately soluble                               |
| Log S (Ali)                                                                         | -5.37                                            |
| Solubility                                                                          | 1.42e-03 mg/ml ; 4.26e-06 mol/l                  |
| Class                                                                               | Moderately soluble                               |
| Log S (SILICOS-IT)                                                                  | -5.09                                            |
| Solubility                                                                          | 2.69e-03 mg/ml ; 8.07e-06 mol/l                  |
| Class                                                                               | Moderately soluble                               |
| Pharmacokinetics                                                                    |                                                  |
| GI absorption                                                                       | High                                             |
| BBB permeant                                                                        | Yes                                              |
| P-gp substrate                                                                      | No                                               |
| CYP1A2 inhibitor                                                                    | Yes                                              |
| CYP2C19 inhibitor                                                                   | Yes                                              |
| CYP2C9 inhibitor                                                                    | Yes                                              |
| CYP2D6 inhibitor                                                                    | Yes                                              |
| CYP3A4 inhibitor                                                                    | Yes                                              |
| Log K <sub>p</sub> (skin permeation)                                                | -4.97 cm <sup>2</sup> /s                         |
| Druglikeness                                                                        |                                                  |
| Lipinski                                                                            | Yes; 0 violation                                 |
| Ghose                                                                               | Yes                                              |
| Veber                                                                               | Yes                                              |
| Egan                                                                                | Yes                                              |
| Muegge                                                                              | Yes                                              |
| Bioavailability Score                                                               | 0.55                                             |
| Medicinal Chemistry                                                                 |                                                  |
| PAINS                                                                               | 0 alert                                          |
| Brenk                                                                               | 0 alert                                          |
| Leadlikeness                                                                        | No; 1 violation: XLOGP3>3.5                      |
| Synthetic accessibility                                                             | 4.65                                             |

**Table S13.** BOILED-Egg plot and SwissADME properties for BUVDAZ

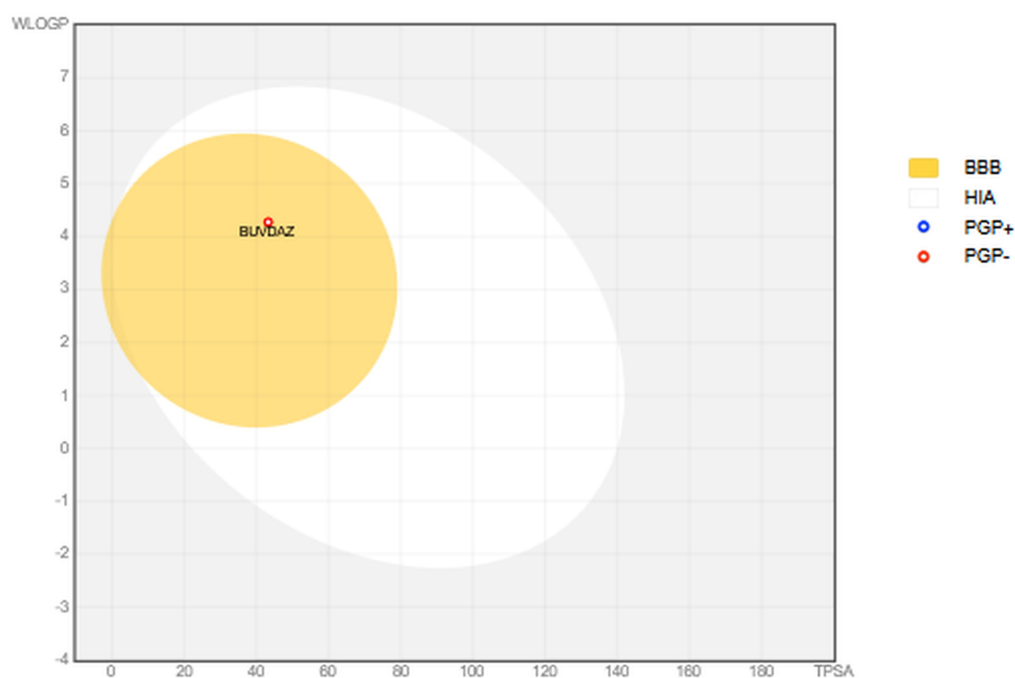

| BUVDAZ                               |                                                           |
|--------------------------------------|-----------------------------------------------------------|
|                                      |                                                           |
| SMILES                               | <chem>O=C(c1ccc(cc1)Cl)OCC(=O)C12CC3CC(C2)CC(C1)C3</chem> |
| Physicochemical Properties           |                                                           |
| Formula                              | C <sub>19</sub> H <sub>21</sub> ClO <sub>3</sub>          |
| Molecular weight                     | 332.82 g/mol                                              |
| Num. heavy atoms                     | 23                                                        |
| Num. arom. heavy atoms               | 6                                                         |
| Fraction Csp <sup>3</sup>            | 0.58                                                      |
| Num. rotatable bonds                 | 5                                                         |
| Num. H-bond acceptors                | 3                                                         |
| Num. H-bond donors                   | 0                                                         |
| Molar Refractivity                   | 89.21                                                     |
| TPSA                                 | 43.37 Å <sup>2</sup>                                      |
| Lipophilicity                        |                                                           |
| Log P <sub>o/w</sub> (iLOGP)         | 3.38                                                      |
| Log P <sub>o/w</sub> (XLOGP3)        | 4.73                                                      |
| Log P <sub>o/w</sub> (WLOGP)         | 4.28                                                      |
| Log P <sub>o/w</sub> (MLOGP)         | 4.02                                                      |
| Log P <sub>o/w</sub> (SILICOS-IT)    | 4.49                                                      |
| Consensus Log P <sub>o/w</sub>       | 4.18                                                      |
| Water Solubility                     |                                                           |
| Log S (ESOL)                         | -4.75                                                     |
| Solubility                           | 5.97e-03 mg/ml ; 1.79e-05 mol/l                           |
| Class                                | Moderately soluble                                        |
| Log S (Ali)                          | -5.37                                                     |
| Solubility                           | 1.42e-03 mg/ml ; 4.26e-06 mol/l                           |
| Class                                | Moderately soluble                                        |
| Log S (SILICOS-IT)                   | -5.09                                                     |
| Solubility                           | 2.69e-03 mg/ml ; 8.07e-06 mol/l                           |
| Class                                | Moderately soluble                                        |
| Pharmacokinetics                     |                                                           |
| GI absorption                        | High                                                      |
| BBB permeant                         | Yes                                                       |
| P-gp substrate                       | No                                                        |
| CYP1A2 inhibitor                     | Yes                                                       |
| CYP2C19 inhibitor                    | Yes                                                       |
| CYP2C9 inhibitor                     | Yes                                                       |
| CYP2D6 inhibitor                     | Yes                                                       |
| CYP3A4 inhibitor                     | Yes                                                       |
| Log K <sub>p</sub> (skin permeation) | -4.97 cm/s                                                |
| Druglikeness                         |                                                           |
| Lipinski                             | Yes; 0 violation                                          |
| Ghose                                | Yes                                                       |
| Veber                                | Yes                                                       |
| Egan                                 | Yes                                                       |
| Muegge                               | Yes                                                       |
| Bioavailability Score                | 0.55                                                      |
| Medicinal Chemistry                  |                                                           |
| PAINS                                | 0 alert                                                   |
| Brenk                                | 0 alert                                                   |
| Leadlikeness                         | No; 1 violation: XLOGP3>3.5                               |
| Synthetic accessibility              | 4.54                                                      |

**Table S14.** BOILED-Egg plot and SwissADME properties for BUVDIH

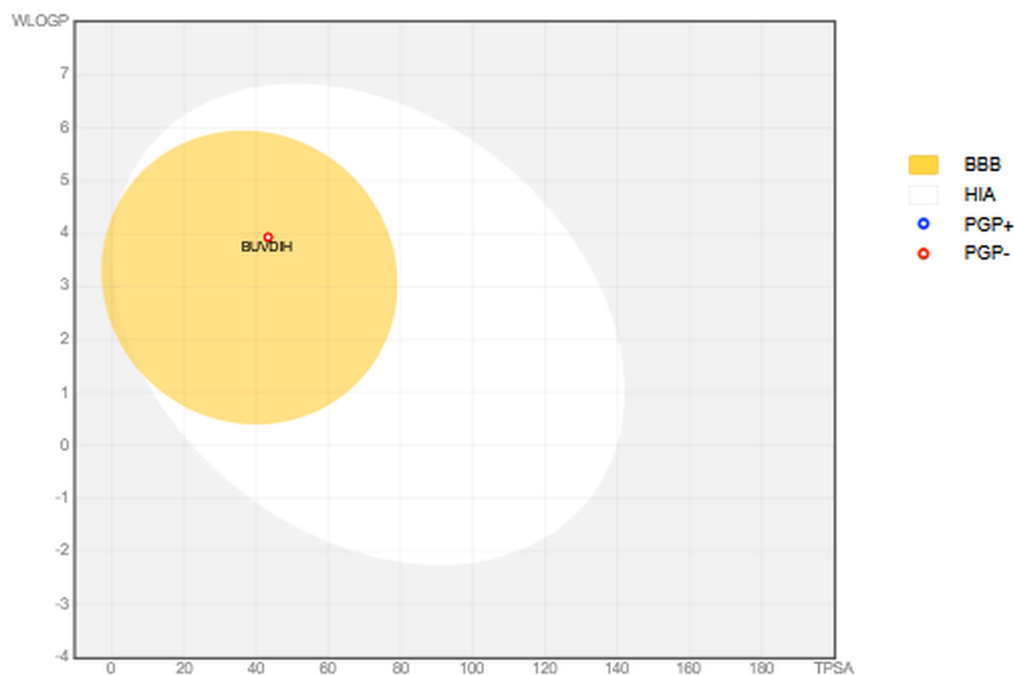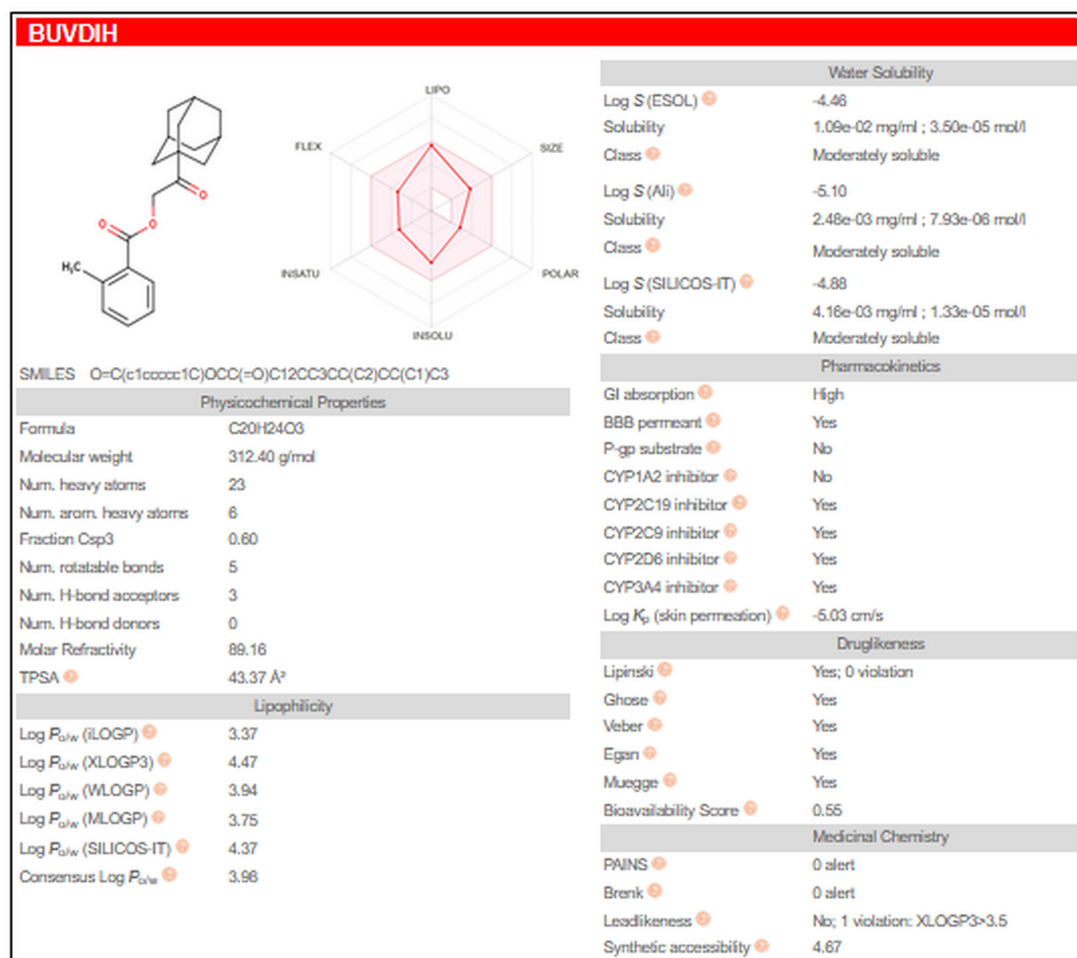

**Table S15.** BOILED-Egg plot and SwissADME properties for BUVDON

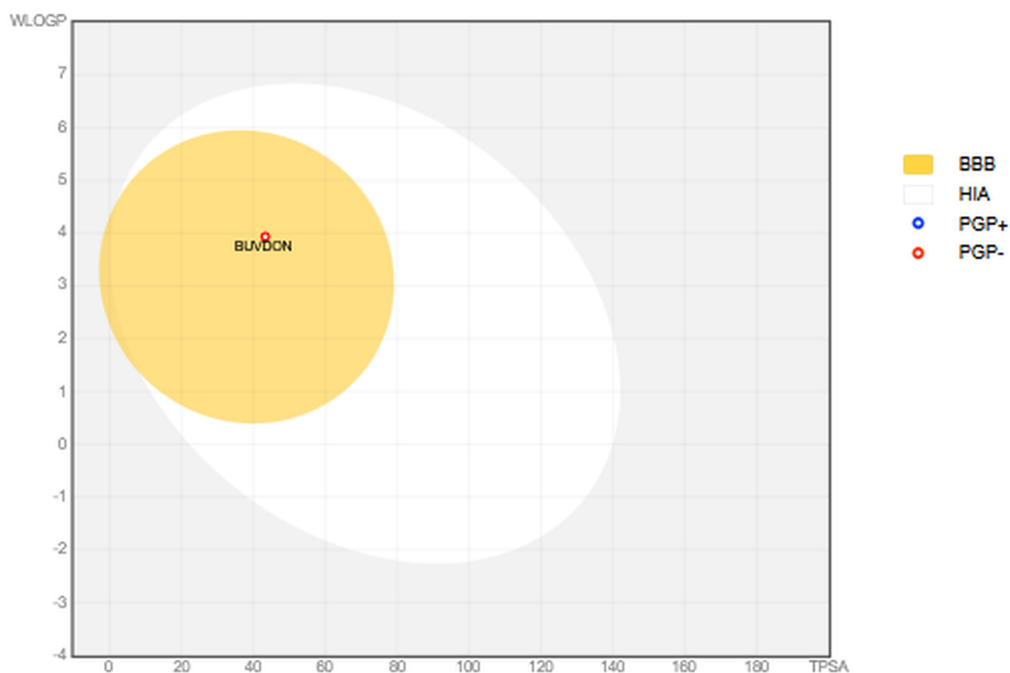

| BUVDON                                                                              |                                 |
|-------------------------------------------------------------------------------------|---------------------------------|
| 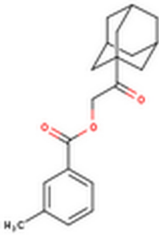 |                                 |
|  |                                 |
| <b>SMILES</b> <chem>Cc1cccc(c1)C(=O)OCC(=O)C12CC3CC(C2)CC(C1)C3</chem>              |                                 |
| Physicochemical Properties                                                          |                                 |
| Formula                                                                             | C20H24O3                        |
| Molecular weight                                                                    | 312.40 g/mol                    |
| Num. heavy atoms                                                                    | 23                              |
| Num. arom. heavy atoms                                                              | 6                               |
| Fraction Csp3                                                                       | 0.60                            |
| Num. rotatable bonds                                                                | 5                               |
| Num. H-bond acceptors                                                               | 3                               |
| Num. H-bond donors                                                                  | 0                               |
| Molar Refractivity                                                                  | 89.16                           |
| TPSA                                                                                | 43.37 Å²                        |
| Lipophilicity                                                                       |                                 |
| Log $P_{o/w}$ (iLOGP)                                                               | 3.19                            |
| Log $P_{o/w}$ (XLOGP3)                                                              | 4.47                            |
| Log $P_{o/w}$ (WLOGP)                                                               | 3.94                            |
| Log $P_{o/w}$ (MLOGP)                                                               | 3.75                            |
| Log $P_{o/w}$ (SILICOS-IT)                                                          | 4.37                            |
| Consensus Log $P_{o/w}$                                                             | 3.94                            |
| Water Solubility                                                                    |                                 |
| Log S (ESOL)                                                                        | -4.46                           |
| Solubility                                                                          | 1.09e-02 mg/ml ; 3.50e-05 mol/l |
| Class                                                                               | Moderately soluble              |
| Log S (Ali)                                                                         | -5.10                           |
| Solubility                                                                          | 2.48e-03 mg/ml ; 7.93e-06 mol/l |
| Class                                                                               | Moderately soluble              |
| Log S (SILICOS-IT)                                                                  | -4.88                           |
| Solubility                                                                          | 4.16e-03 mg/ml ; 1.33e-05 mol/l |
| Class                                                                               | Moderately soluble              |
| Pharmacokinetics                                                                    |                                 |
| GI absorption                                                                       | High                            |
| BBB permeant                                                                        | Yes                             |
| P-gp substrate                                                                      | No                              |
| CYP1A2 inhibitor                                                                    | No                              |
| CYP2C19 inhibitor                                                                   | Yes                             |
| CYP2C9 inhibitor                                                                    | Yes                             |
| CYP2D6 inhibitor                                                                    | Yes                             |
| CYP3A4 inhibitor                                                                    | Yes                             |
| Log $K_p$ (skin permeation)                                                         | -5.03 cm²/s                     |
| Druglikeness                                                                        |                                 |
| Lipinski                                                                            | Yes; 0 violation                |
| Ghose                                                                               | Yes                             |
| Veber                                                                               | Yes                             |
| Egan                                                                                | Yes                             |
| Muegge                                                                              | Yes                             |
| Bioavailability Score                                                               | 0.55                            |
| Medicinal Chemistry                                                                 |                                 |
| PAINS                                                                               | 0 alert                         |
| Brenk                                                                               | 0 alert                         |
| Leadlikeness                                                                        | No; 1 violation: XLOGP3>3.5     |
| Synthetic accessibility                                                             | 4.70                            |

**Table S16.** BOILED-Egg plot and SwissADME properties for BUVDUT

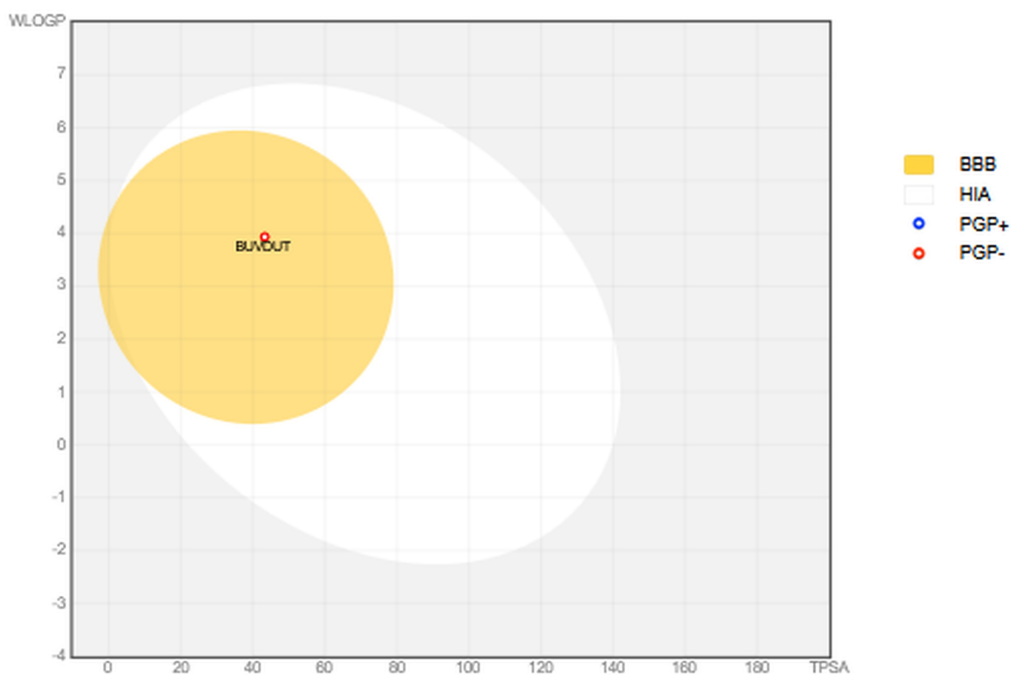

| BUVDUT                                                          |                                 |
|-----------------------------------------------------------------|---------------------------------|
|                                                                 |                                 |
| SMILES <chem>O=C(c1ccc(cc1)C)OCC(=O)C12CC3CC(C2)CC(C1)C3</chem> |                                 |
| Physicochemical Properties                                      |                                 |
| Formula                                                         | C20H24O3                        |
| Molecular weight                                                | 312.40 g/mol                    |
| Num. heavy atoms                                                | 23                              |
| Num. arom. heavy atoms                                          | 6                               |
| Fraction Csp3                                                   | 0.60                            |
| Num. rotatable bonds                                            | 5                               |
| Num. H-bond acceptors                                           | 3                               |
| Num. H-bond donors                                              | 0                               |
| Molar Refractivity                                              | 89.16                           |
| TPSA                                                            | 43.37 Å²                        |
| Lipophilicity                                                   |                                 |
| Log P <sub>ow</sub> (iLOGP)                                     | 3.30                            |
| Log P <sub>ow</sub> (XLOGP3)                                    | 4.47                            |
| Log P <sub>ow</sub> (WLOGP)                                     | 3.94                            |
| Log P <sub>ow</sub> (MLOGP)                                     | 3.75                            |
| Log P <sub>ow</sub> (SILICOS-IT)                                | 4.37                            |
| Consensus Log P <sub>ow</sub>                                   | 3.97                            |
| Water Solubility                                                |                                 |
| Log S (ESOL)                                                    | -4.46                           |
| Solubility                                                      | 1.09e-02 mg/ml ; 3.50e-05 mol/l |
| Class                                                           | Moderately soluble              |
| Log S (Ali)                                                     | -5.10                           |
| Solubility                                                      | 2.48e-03 mg/ml ; 7.93e-06 mol/l |
| Class                                                           | Moderately soluble              |
| Log S (SILICOS-IT)                                              | -4.88                           |
| Solubility                                                      | 4.16e-03 mg/ml ; 1.33e-05 mol/l |
| Class                                                           | Moderately soluble              |
| Pharmacokinetics                                                |                                 |
| GI absorption                                                   | High                            |
| BBB permeant                                                    | Yes                             |
| P-gp substrate                                                  | No                              |
| CYP1A2 inhibitor                                                | No                              |
| CYP2C19 inhibitor                                               | Yes                             |
| CYP2C9 inhibitor                                                | Yes                             |
| CYP2D6 inhibitor                                                | Yes                             |
| CYP3A4 inhibitor                                                | Yes                             |
| Log K <sub>p</sub> (skin permeation)                            | -5.03 cm/s                      |
| Druglikeness                                                    |                                 |
| Lipinski                                                        | Yes; 0 violation                |
| Ghose                                                           | Yes                             |
| Veber                                                           | Yes                             |
| Egan                                                            | Yes                             |
| Muegge                                                          | Yes                             |
| Bioavailability Score                                           | 0.55                            |
| Medicinal Chemistry                                             |                                 |
| PAINS                                                           | 0 alert                         |
| Brenk                                                           | 0 alert                         |
| Leadlikeness                                                    | No; 1 violation: XLOGP3>3.5     |
| Synthetic accessibility                                         | 4.62                            |

**Table S17.** BOILED-Egg plot and SwissADME properties for BUTPUD

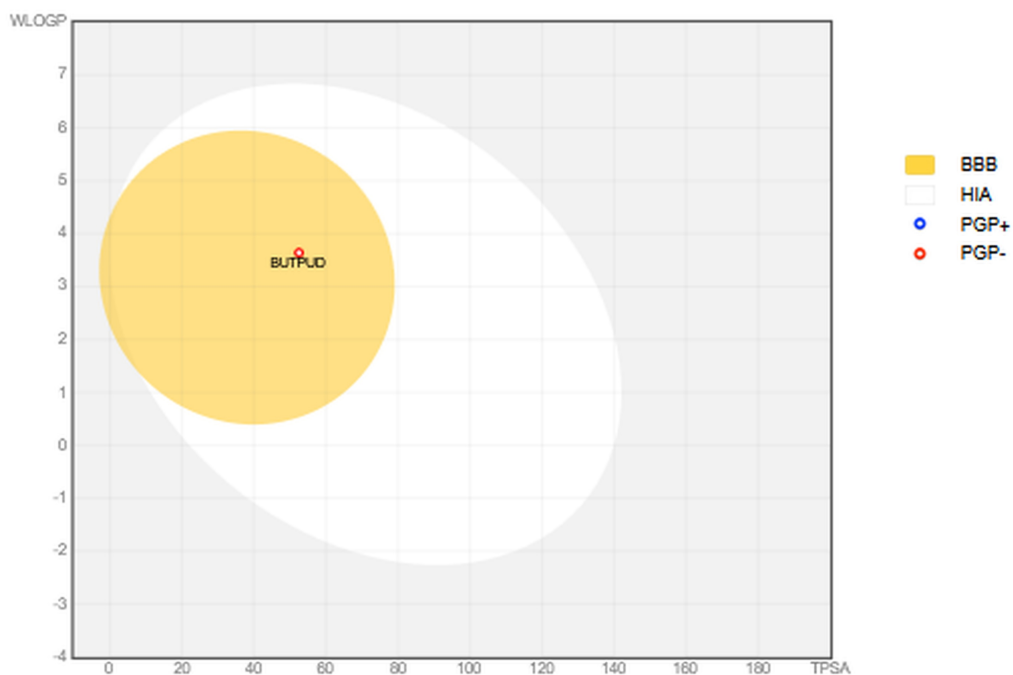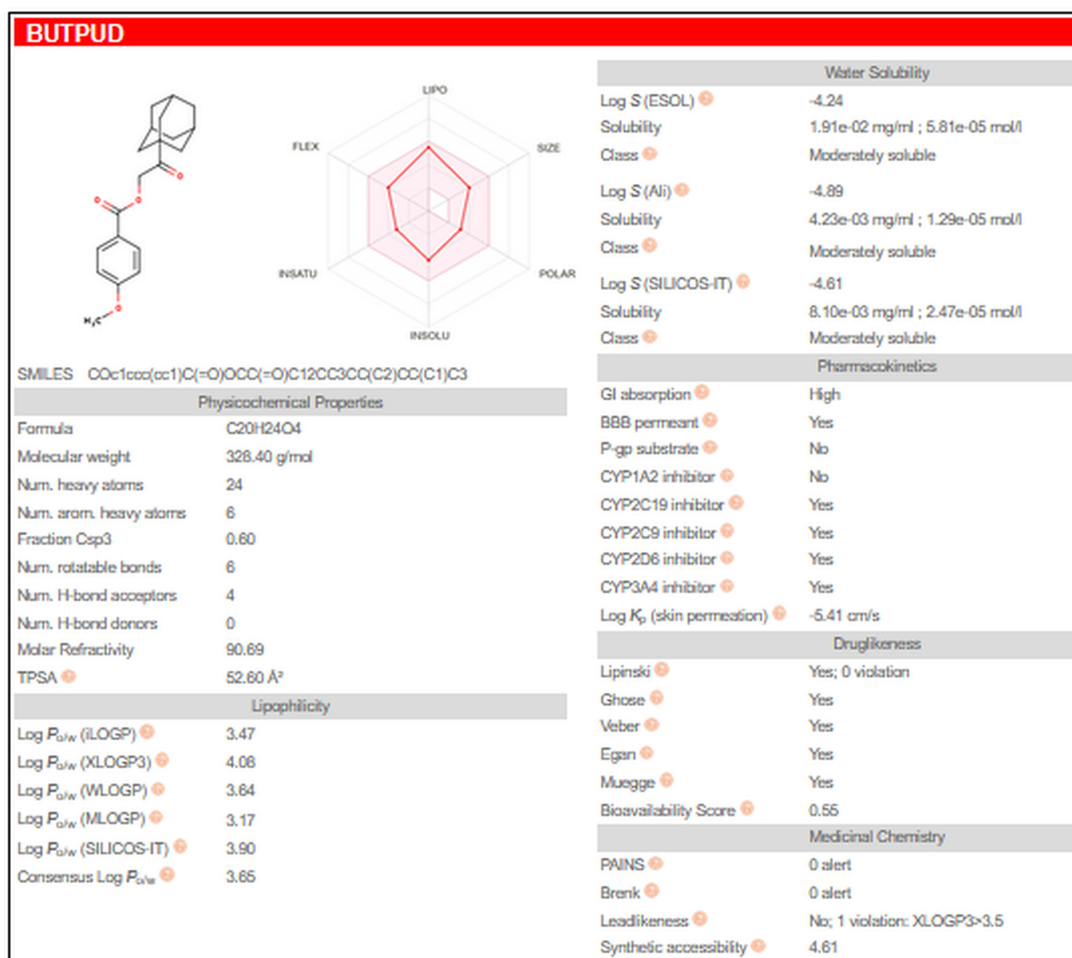

**Table S18.** BOILED-Egg plot and SwissADME properties for BUTQEO

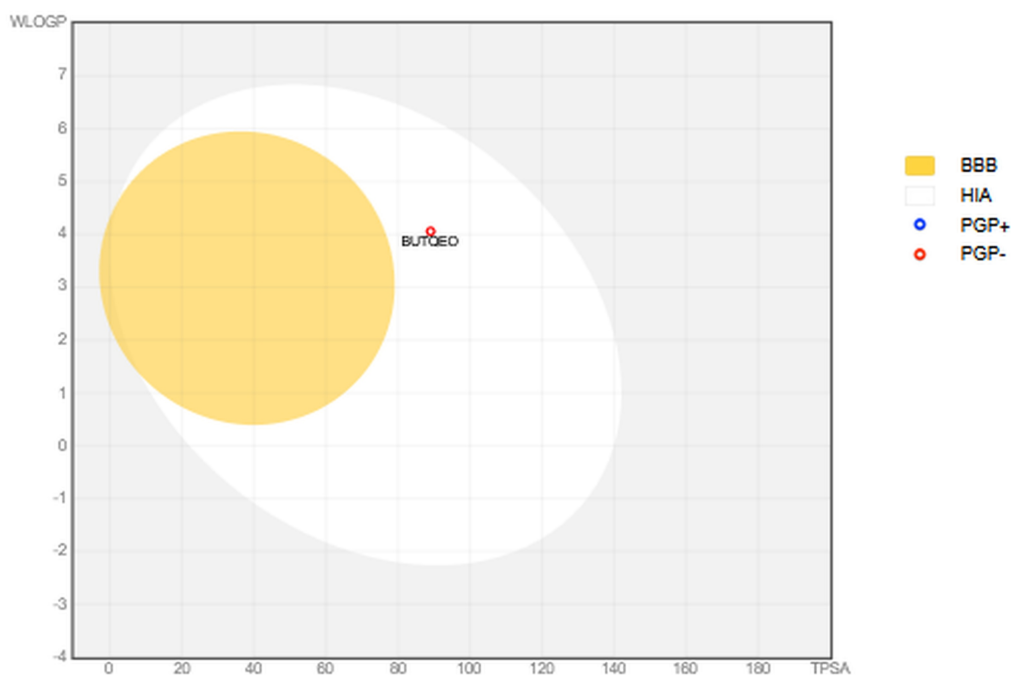

| BUTQEO                                                                              |                                                                                     |
|-------------------------------------------------------------------------------------|-------------------------------------------------------------------------------------|
| 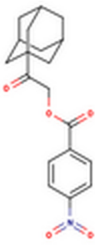 |  |
| SMILES <chem>O=C(c1ccc(cc1)N(=O)=O)OCC(=O)C12CC3CC(C2)CC(C1)C3</chem>               |                                                                                     |
| Physicochemical Properties                                                          |                                                                                     |
| Formula                                                                             | C <sub>19</sub> H <sub>21</sub> NO <sub>5</sub>                                     |
| Molecular weight                                                                    | 343.37 g/mol                                                                        |
| Num. heavy atoms                                                                    | 25                                                                                  |
| Num. arom. heavy atoms                                                              | 6                                                                                   |
| Fraction Csp <sup>3</sup>                                                           | 0.58                                                                                |
| Num. rotatable bonds                                                                | 6                                                                                   |
| Num. H-bond acceptors                                                               | 5                                                                                   |
| Num. H-bond donors                                                                  | 0                                                                                   |
| Molar Refractivity                                                                  | 93.02                                                                               |
| TPSA                                                                                | 89.19 Å <sup>2</sup>                                                                |
| Lipophilicity                                                                       |                                                                                     |
| Log P <sub>ow</sub> (iLOGP)                                                         | 2.24                                                                                |
| Log P <sub>ow</sub> (XLOGP3)                                                        | 3.94                                                                                |
| Log P <sub>ow</sub> (WLOGP)                                                         | 4.06                                                                                |
| Log P <sub>ow</sub> (MLOGP)                                                         | 2.42                                                                                |
| Log P <sub>ow</sub> (SILICOS-IT)                                                    | 2.08                                                                                |
| Consensus Log P <sub>ow</sub>                                                       | 2.95                                                                                |
| Water Solubility                                                                    |                                                                                     |
| Log S (ESOL)                                                                        | -4.23                                                                               |
| Solubility                                                                          | 2.01e-02 mg/ml ; 5.85e-05 mol/l                                                     |
| Class                                                                               | Moderately soluble                                                                  |
| Log S (Ali)                                                                         | -5.51                                                                               |
| Solubility                                                                          | 1.05e-03 mg/ml ; 3.07e-06 mol/l                                                     |
| Class                                                                               | Moderately soluble                                                                  |
| Log S (SILICOS-IT)                                                                  | -4.33                                                                               |
| Solubility                                                                          | 1.61e-02 mg/ml ; 4.68e-05 mol/l                                                     |
| Class                                                                               | Moderately soluble                                                                  |
| Pharmacokinetics                                                                    |                                                                                     |
| GI absorption                                                                       | High                                                                                |
| BBB permeant                                                                        | No                                                                                  |
| P-gp substrate                                                                      | No                                                                                  |
| CYP1A2 inhibitor                                                                    | No                                                                                  |
| CYP2C19 inhibitor                                                                   | Yes                                                                                 |
| CYP2C9 inhibitor                                                                    | Yes                                                                                 |
| CYP2D6 inhibitor                                                                    | No                                                                                  |
| CYP3A4 inhibitor                                                                    | Yes                                                                                 |
| Log K <sub>p</sub> (skin permeation)                                                | -5.60 cm/s                                                                          |
| Druglikeness                                                                        |                                                                                     |
| Lipinski                                                                            | Yes; 0 violation                                                                    |
| Ghose                                                                               | Yes                                                                                 |
| Veber                                                                               | Yes                                                                                 |
| Egan                                                                                | Yes                                                                                 |
| Muegge                                                                              | Yes                                                                                 |
| Bioavailability Score                                                               | 0.55                                                                                |
| Medicinal Chemistry                                                                 |                                                                                     |
| PAINS                                                                               | 0 alert                                                                             |
| Brenk                                                                               | 1 alert: nitro_group                                                                |
| Leadlikeness                                                                        | No; 1 violation: XLOGP3>3.5                                                         |
| Synthetic accessibility                                                             | 4.64                                                                                |
